# Supplementary material
Source: PubMed Central journal article supplement (PMC2907259)
Supplement: NIHMS212258-supplement-supplement_1.pdf [file NIHMS212258-supplement-supplement_1.pdf]

**a Primary and Secondary V(D)J Recombination during B Cell Development**

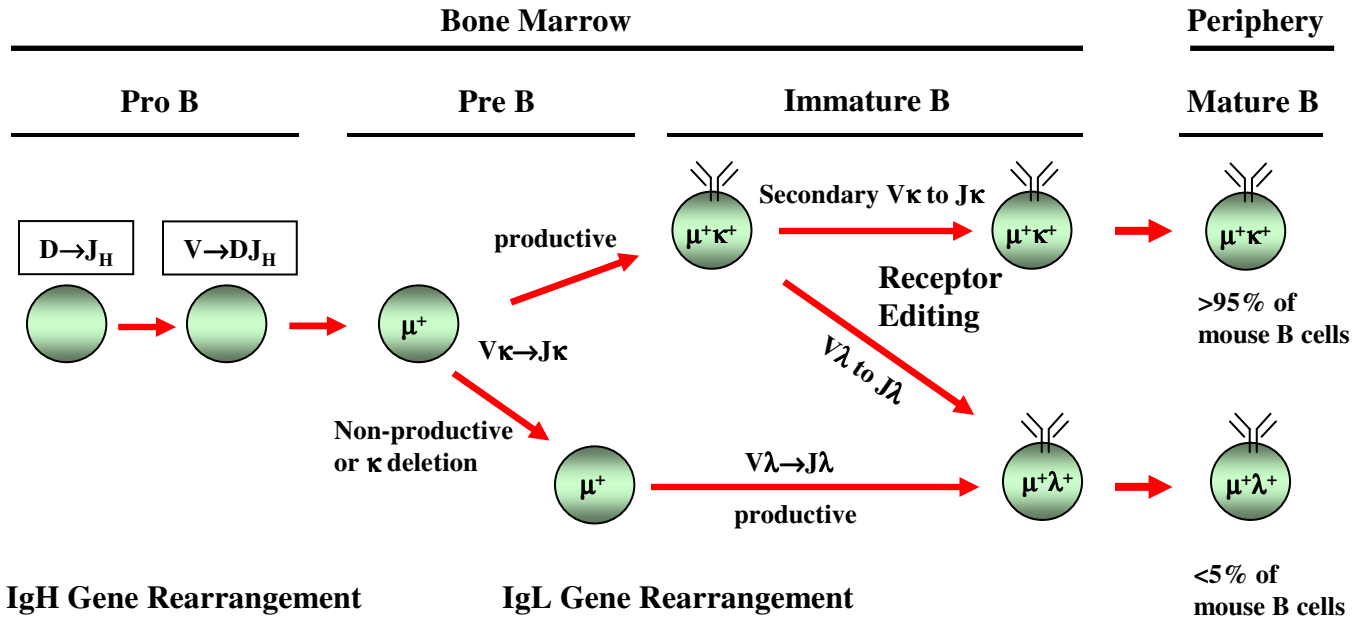

**b IgH V(D)J recombination and CSR**

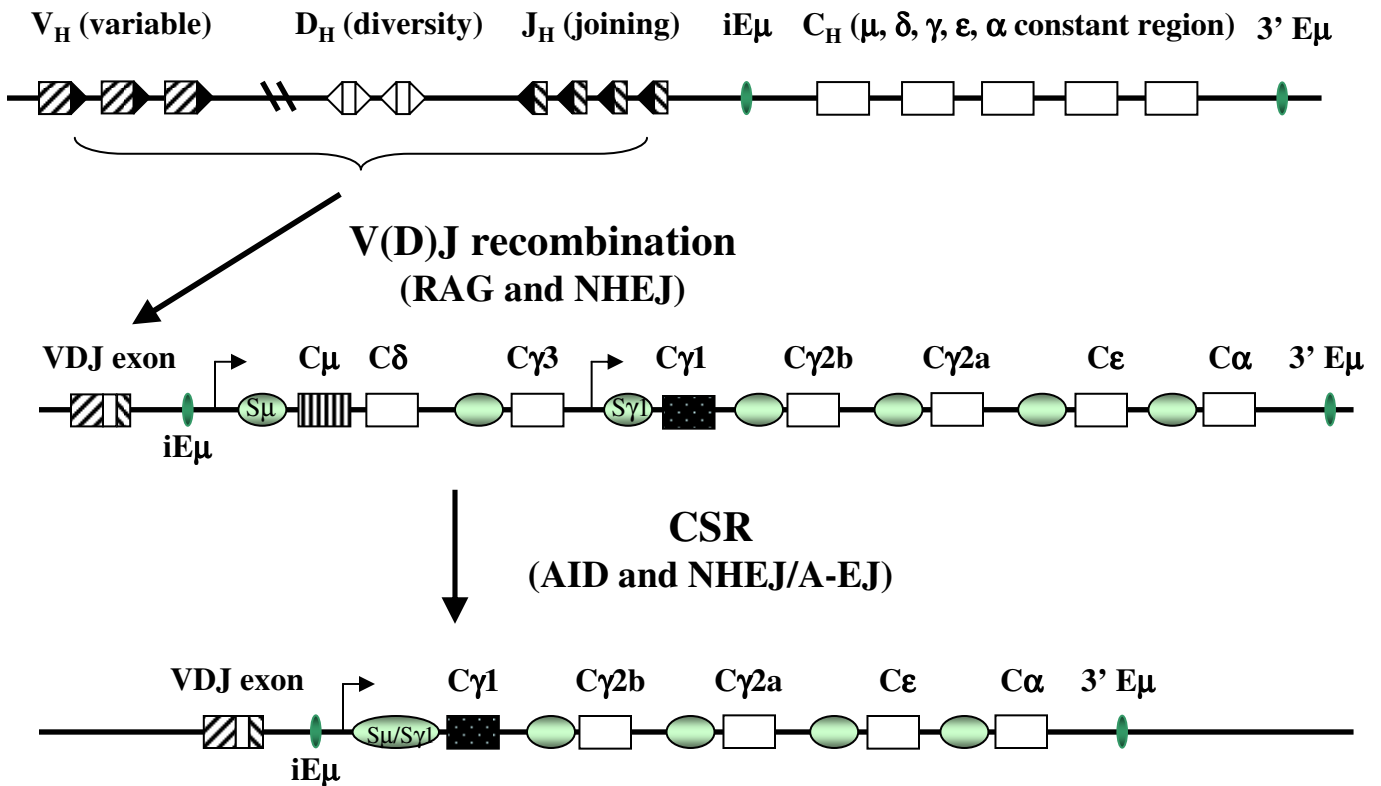

**Supplementary Fig.1**

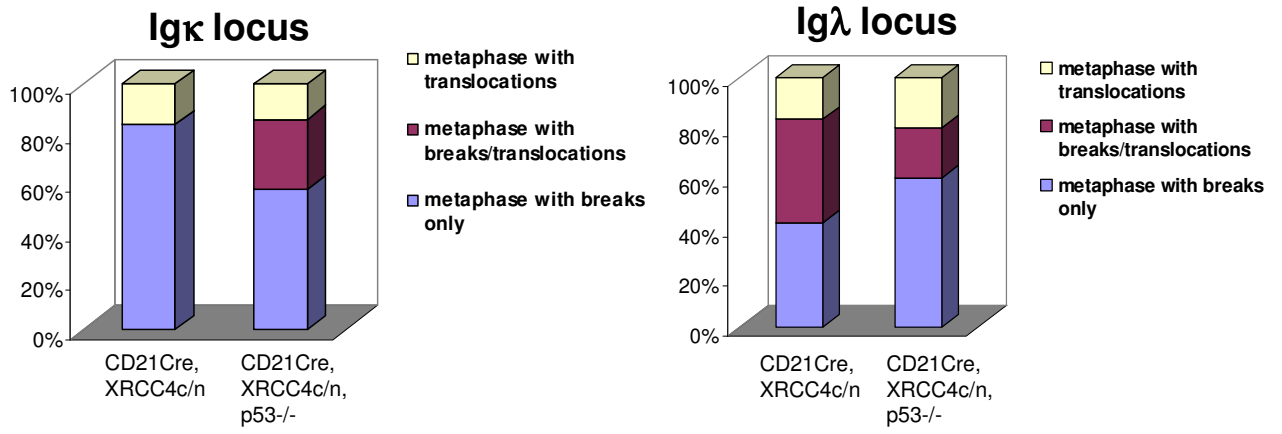

**Supplementary Fig.2**

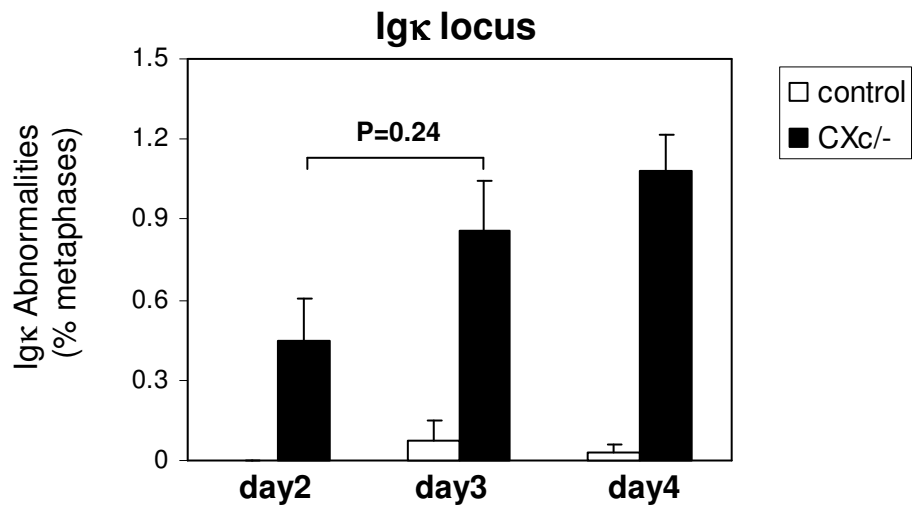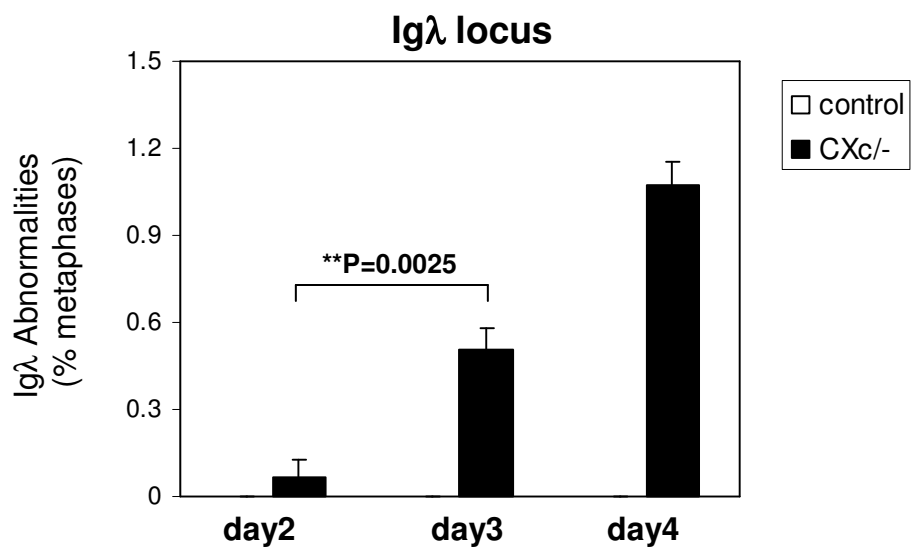

Supplementary Fig.3

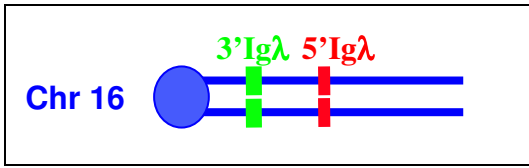

**Missing 5'Igλ**  
(isolated green signal)

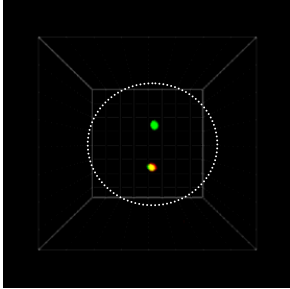

**Missing 3'Igλ**  
(isolated red signal)

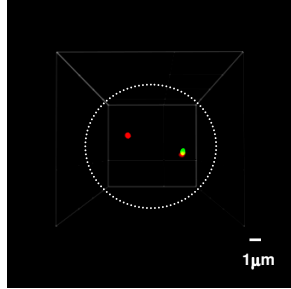

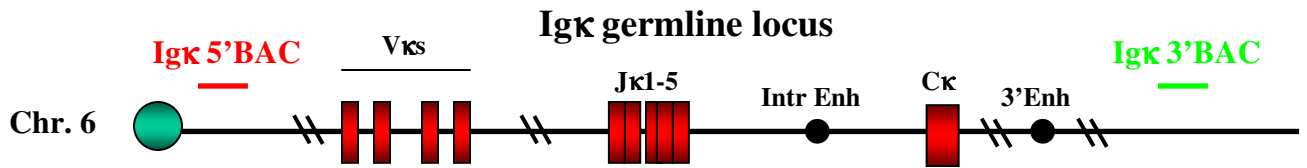

**Ig $\kappa$  FISH in  $CXc^{-/-}AID^{-/-}$  peripheral B cells**

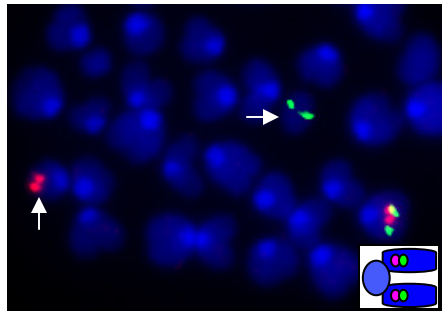

Chromosome break at Ig $\kappa$

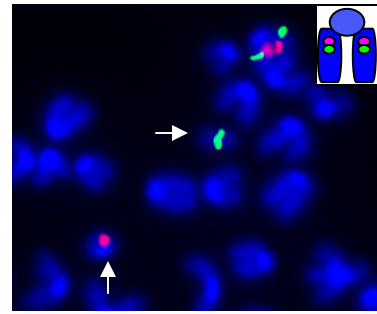

Chromosome break at Ig $\kappa$

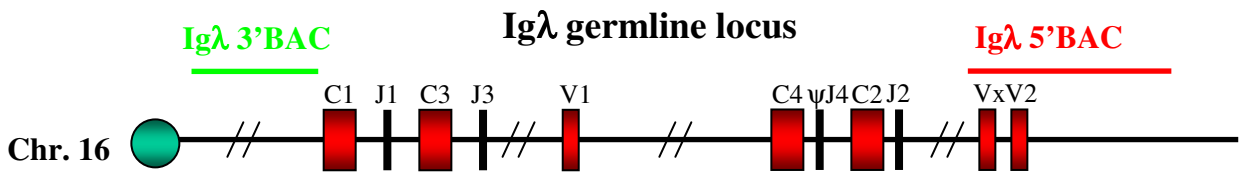

**Ig $\lambda$  FISH in  $CXc^{-/-}AID^{-/-}$  peripheral B cells**

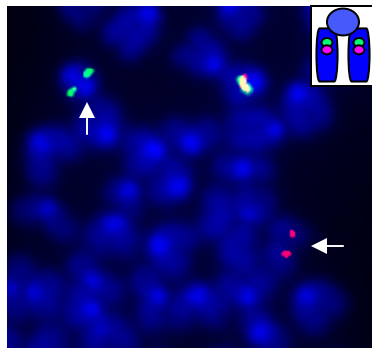

Chromosome break/translocation at Ig $\lambda$

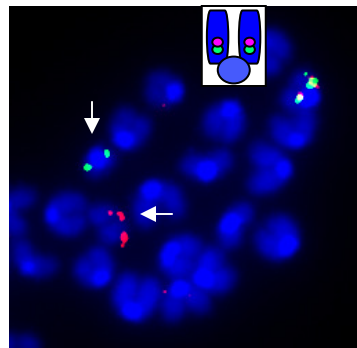

Chromosome break at Ig $\lambda$

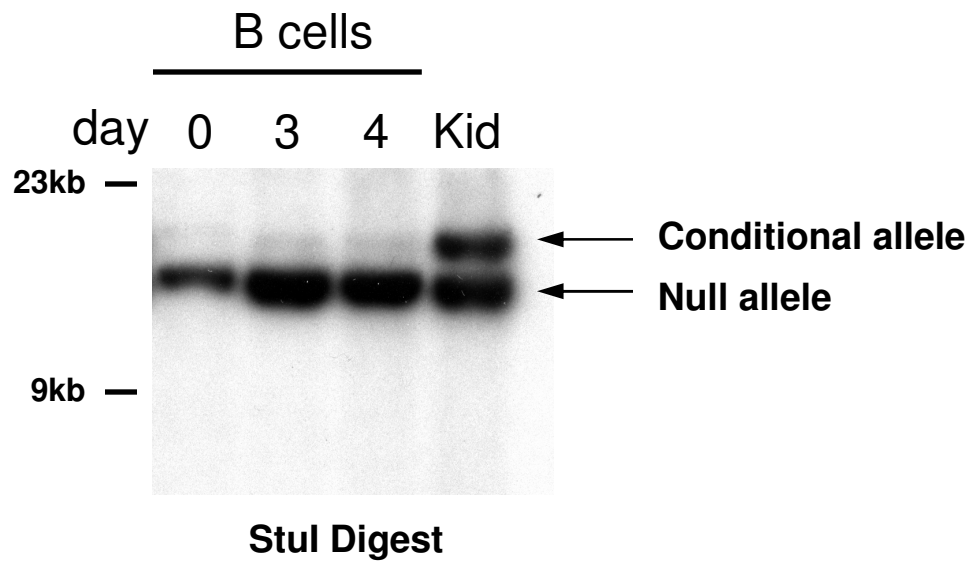

**Supplementary Fig.6**

## Sequential FISH on the same metaphase

1<sup>st</sup> FISH Igκ (5'Igκ, 3'Igκ)

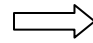

2<sup>nd</sup> FISH Igλ (3'Igλ, 5'Igλ)

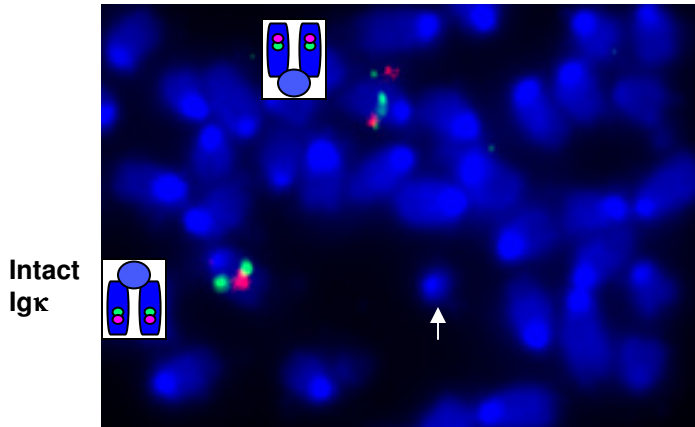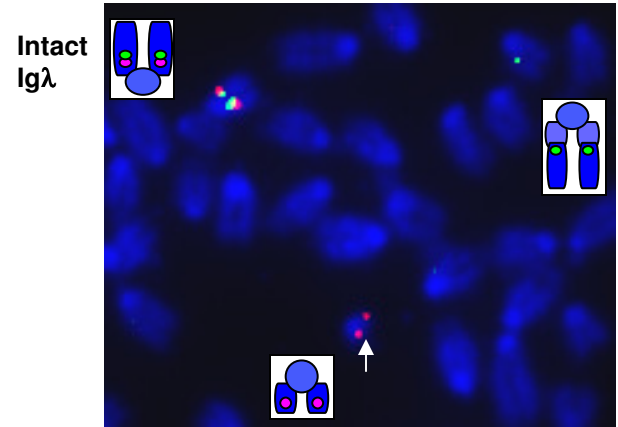

Chromosome  
break/translocation at Igλ

Absence of simultaneous Igκ and Igλ breaks but frequent simultaneous IgH and Igλ abnormalities in the same metaphases from Xrcc4-deficient B cells activated with αCD40/IL4 for 4 days

| FISH                 | Locus                | Number of mice | Number of Metaphases | Metaphases with Igκ abnormalities (%)     | Metaphases with Igλ abnormalities (%)      |
|----------------------|----------------------|----------------|----------------------|-------------------------------------------|--------------------------------------------|
| 1st                  | Igκ locus            | 6              | 1200                 | 12 (1%)                                   | 0 out of 12 (0%)                           |
| 2nd                  | Igλ locus            | 6              | 1200                 | 0 out of 11 (0%)                          | 11(0.92%)                                  |
| 1 <sup>st</sup> FISH | 2 <sup>nd</sup> FISH | Number of mice | Number of Metaphases | Metaphases with Igλ/IgH Abnormalities (%) | Metaphases with Igλ abnormalities only (%) |
| Igλ locus            | IgH locus            | 3              | 2085                 | 17 (0.82%)                                | 11 (0.53%)                                 |

Supplementary Fig.7

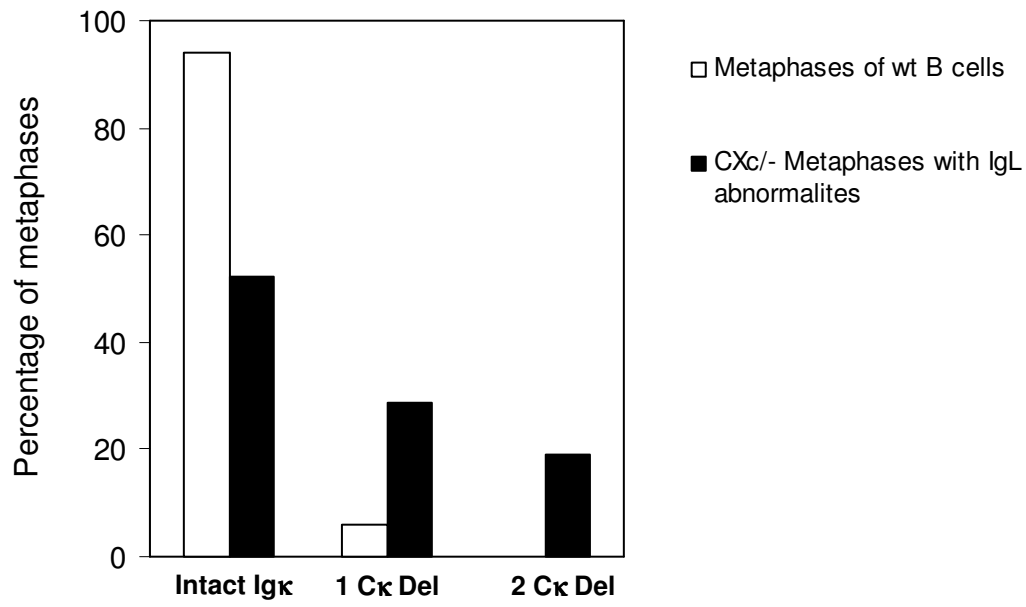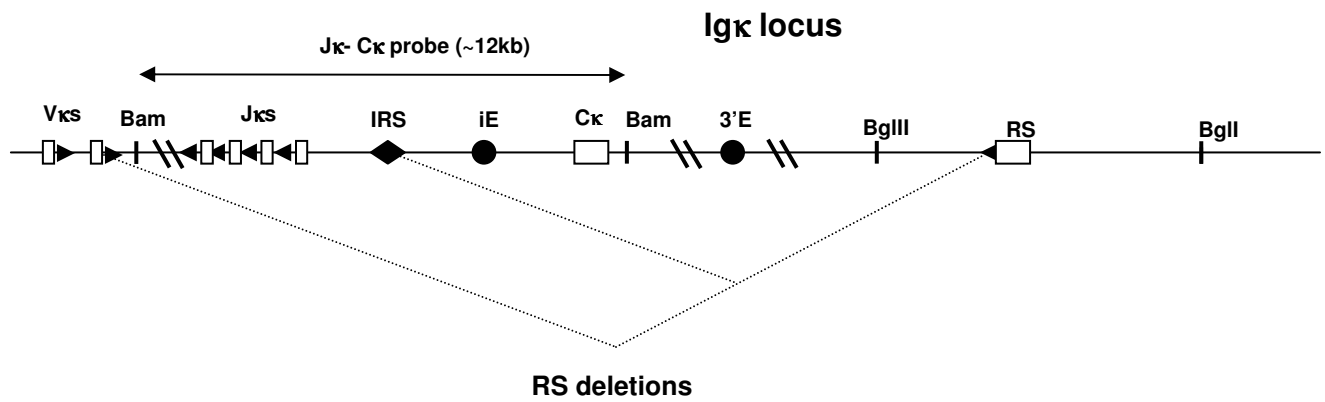

**Supplementary Fig.8**



**a**

Igκ FISH (5'Igκ, 3'Igκ)

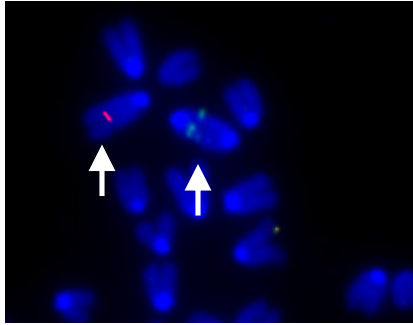

Chr. translocation  
at Igκ

Chromosome paints  
6(green)/12(red)

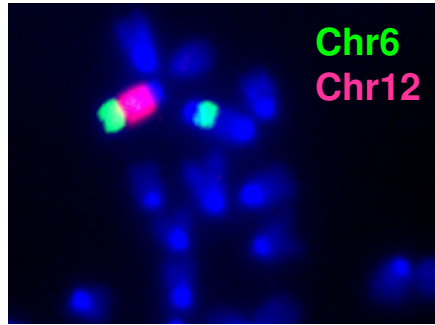

T(12;6)

IgH FISH (3'IgH 5'IgH)

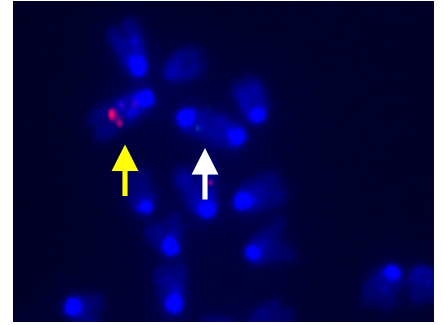

Chr. translocation  
at IgH

Sequential Igκ FISH, chr paints and IgH FISH on the same metaphases

→ : chrs with Igκ abnormalities; → : chrs with IgH abnormalities

b

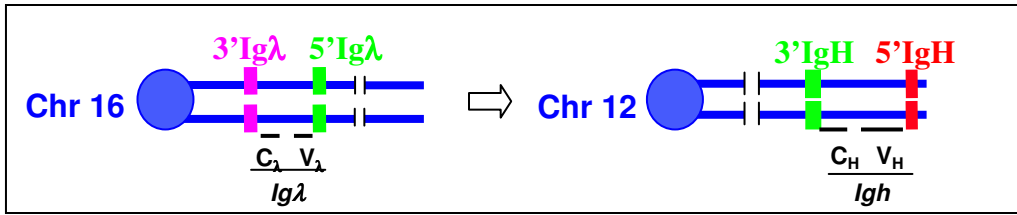

### Sequential Igλ and IgH FISH on the same metaphases

→ : chrs with Igλ abnormalities; → : chrs with IgH abnormalities

#### Metaphase 1

1<sup>st</sup> FISH Igλ (3'Igλ, 5'Igλ) ⇨ 2<sup>nd</sup> FISH IgH (3'IgH, 5'IgH)

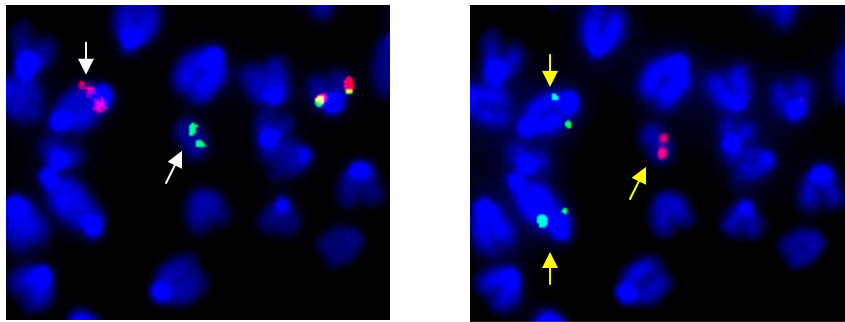

#### Metaphase 2

1<sup>st</sup> FISH Igλ (3'Igλ, 5'Igλ) ⇨ 2<sup>nd</sup> FISH IgH (3'IgH, 5'IgH)

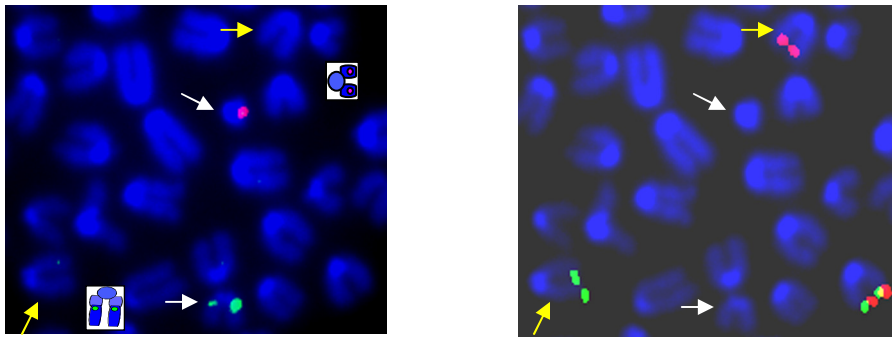

#### Metaphase 3

1<sup>st</sup> FISH Igλ (3'Igλ, 5'Igλ) ⇨ 2<sup>nd</sup> FISH IgH (3'IgH, 5'IgH)

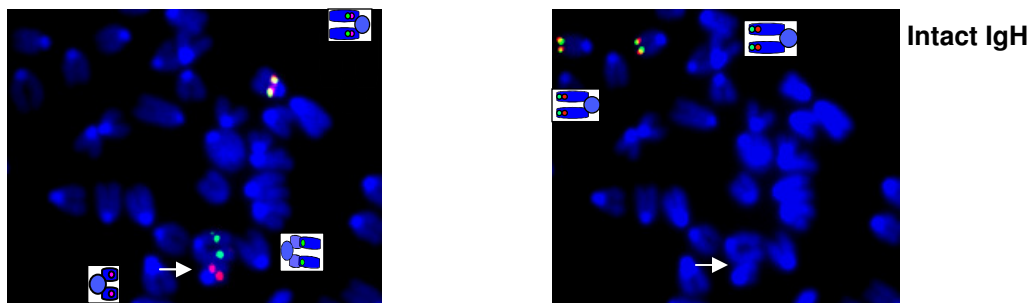

Chromosome  
break/translocation at Igλ

Intact IgH

Supplementary Fig.9b

C

Igλ FISH (3'Igλ, 5'Igλ)

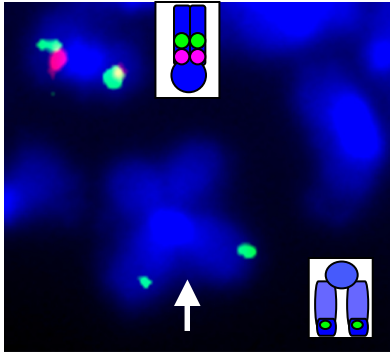

Chr. translocation  
at Igλ

Chromosome paints  
12(green)/16(red)

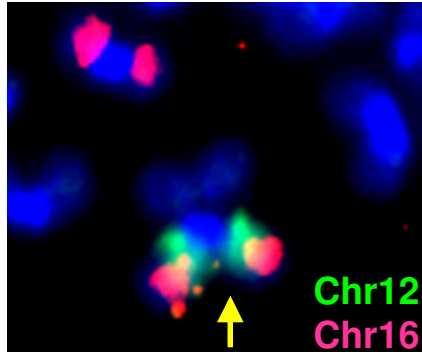

T(12;16)

IgH FISH (3'IgH, 5'IgH)

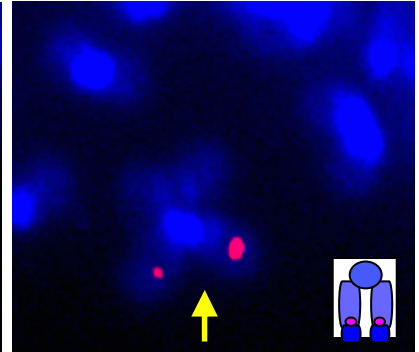

Chr. translocation  
at IgH

Sequential Igλ FISH, chr paints, and IgH FISH on the same metaphases

→ : chrs with Igλ abnormalities; → : chrs with IgH abnormalities

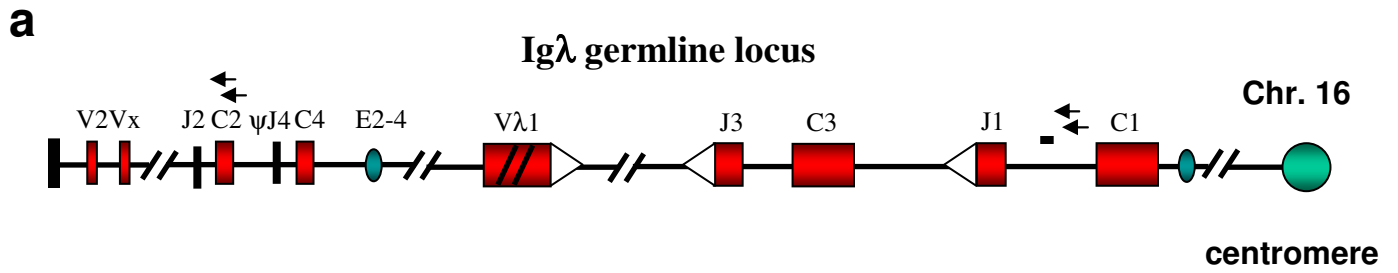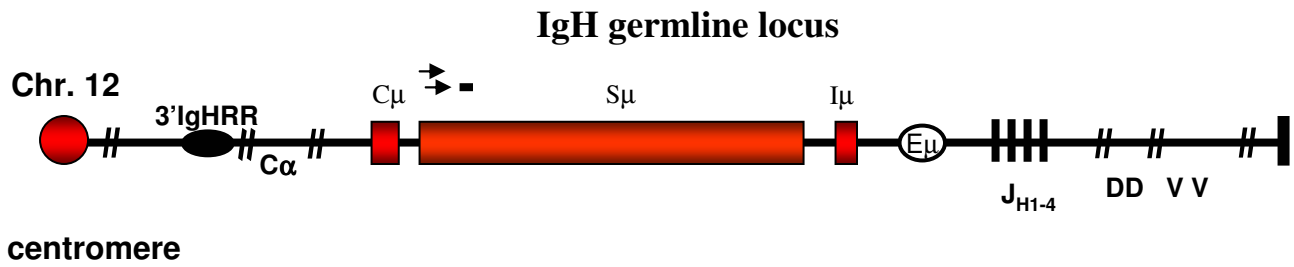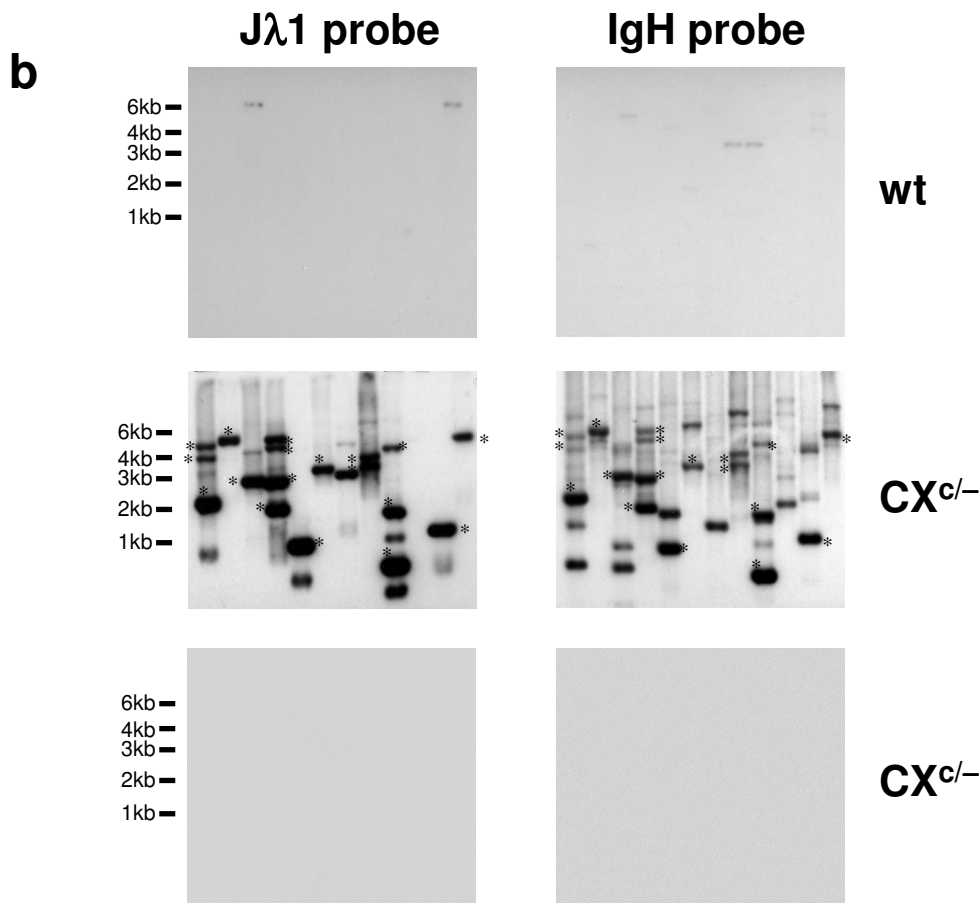

\*:bands hybridize with both IgH and Jλ1 probes





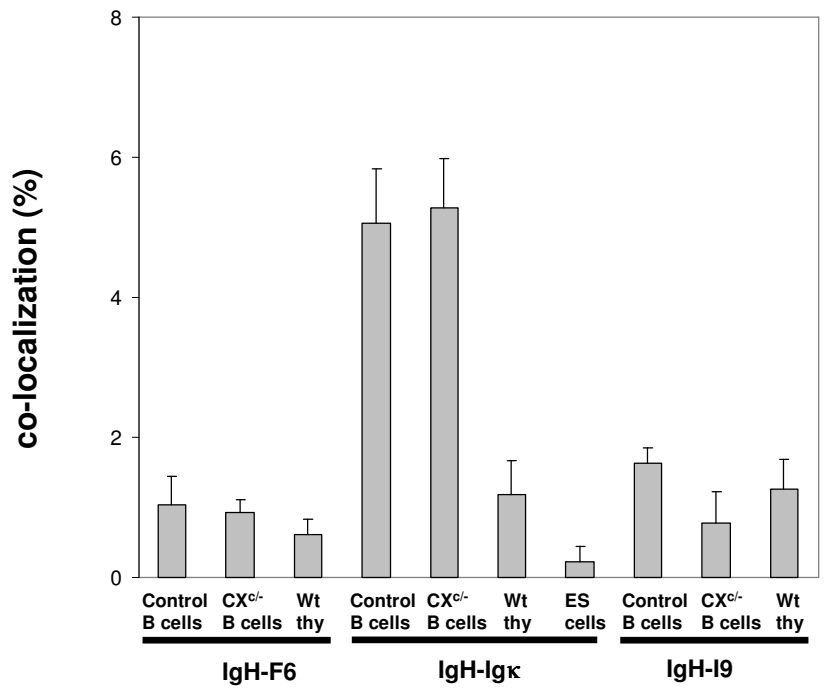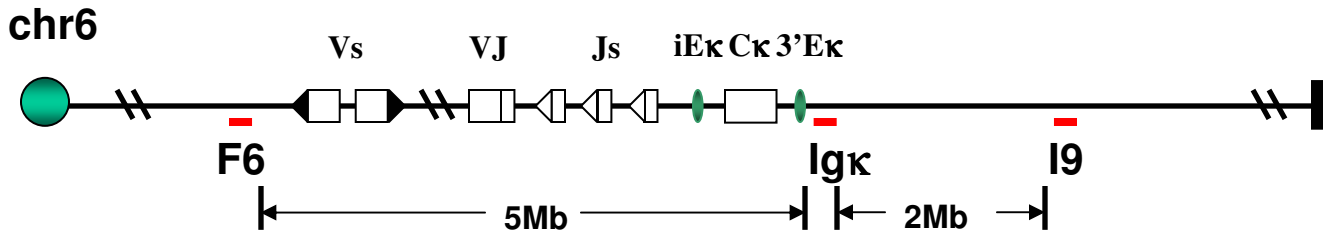

Supplementary Fig. 12

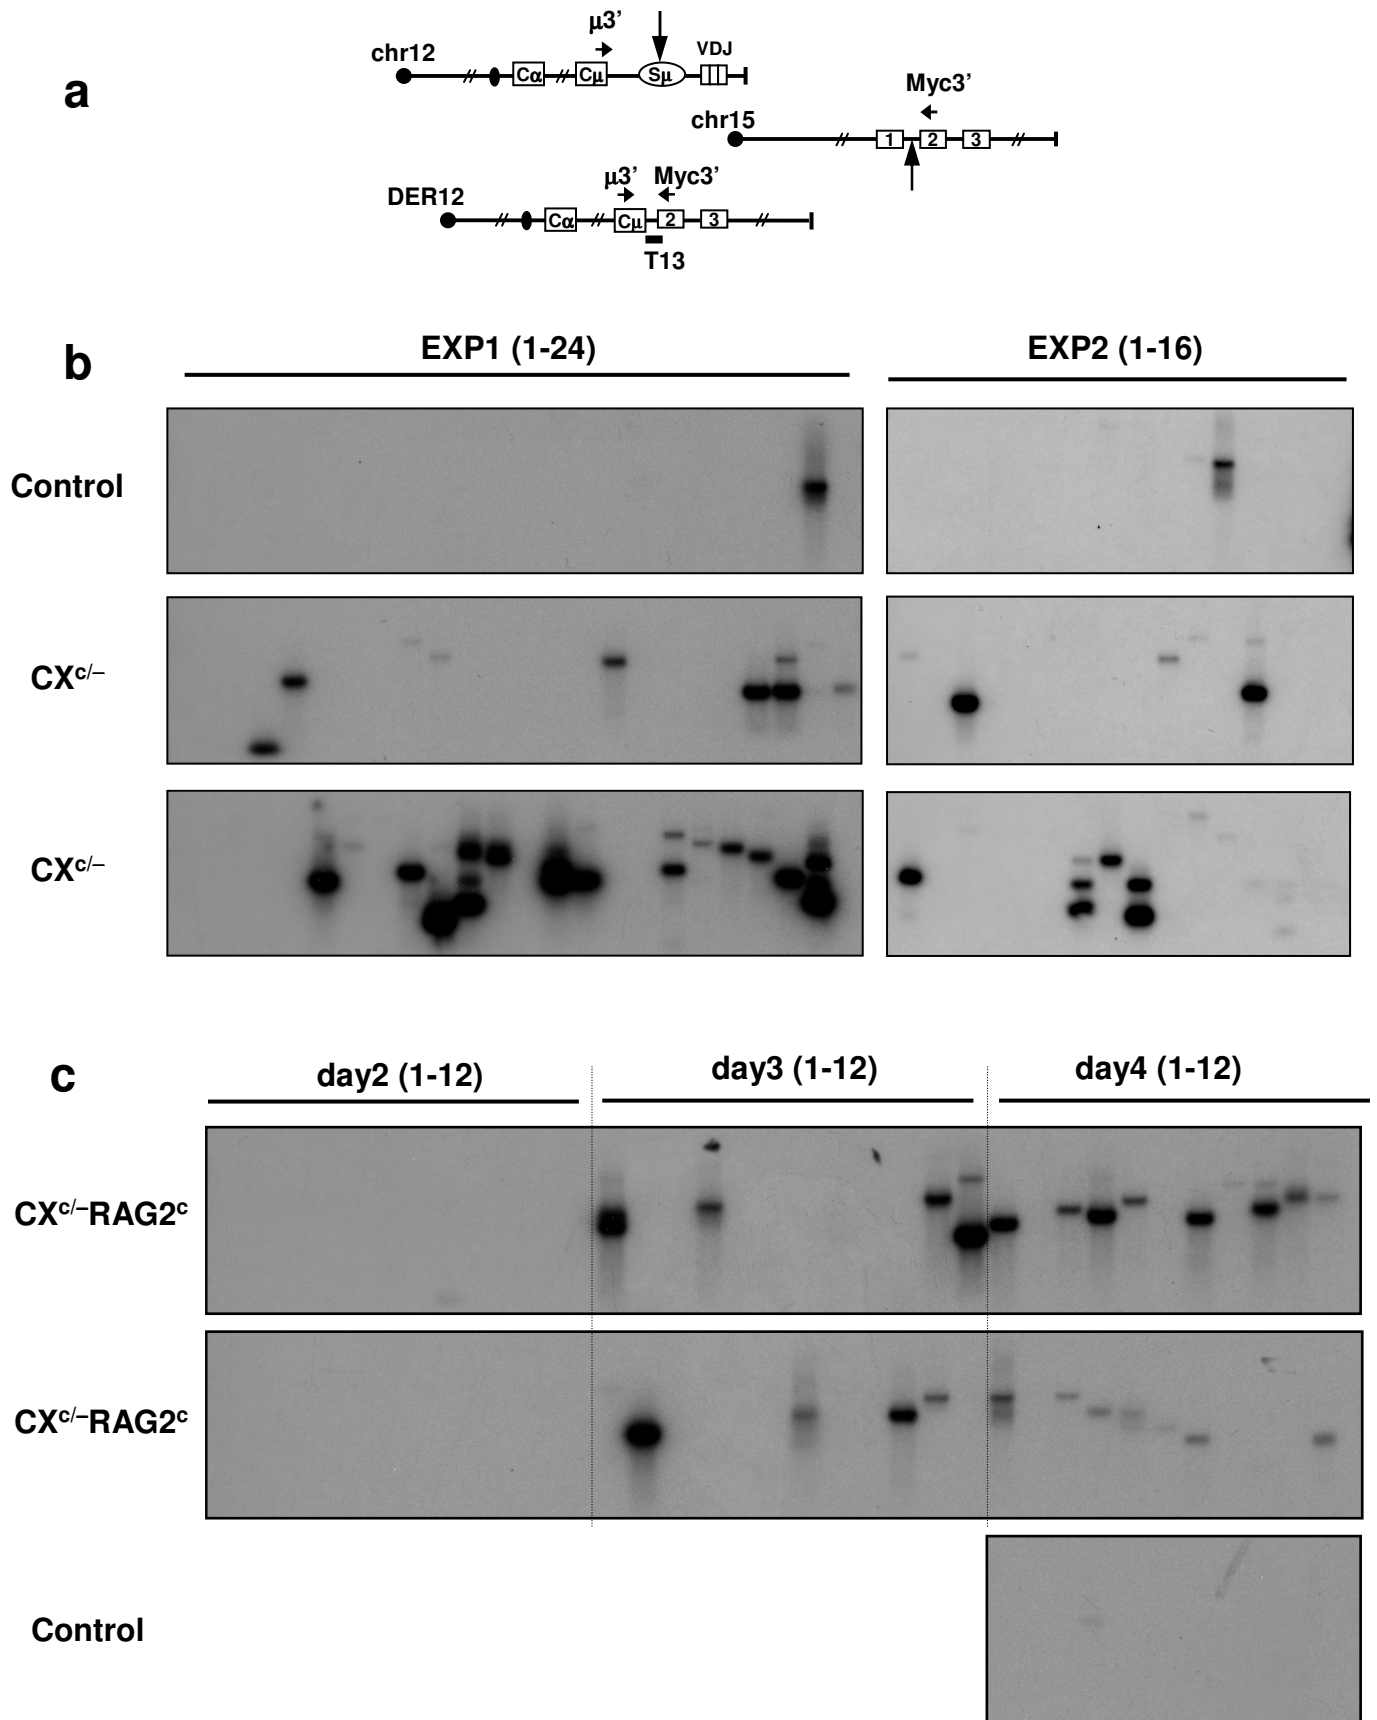

Supplementary Fig. 13a-c



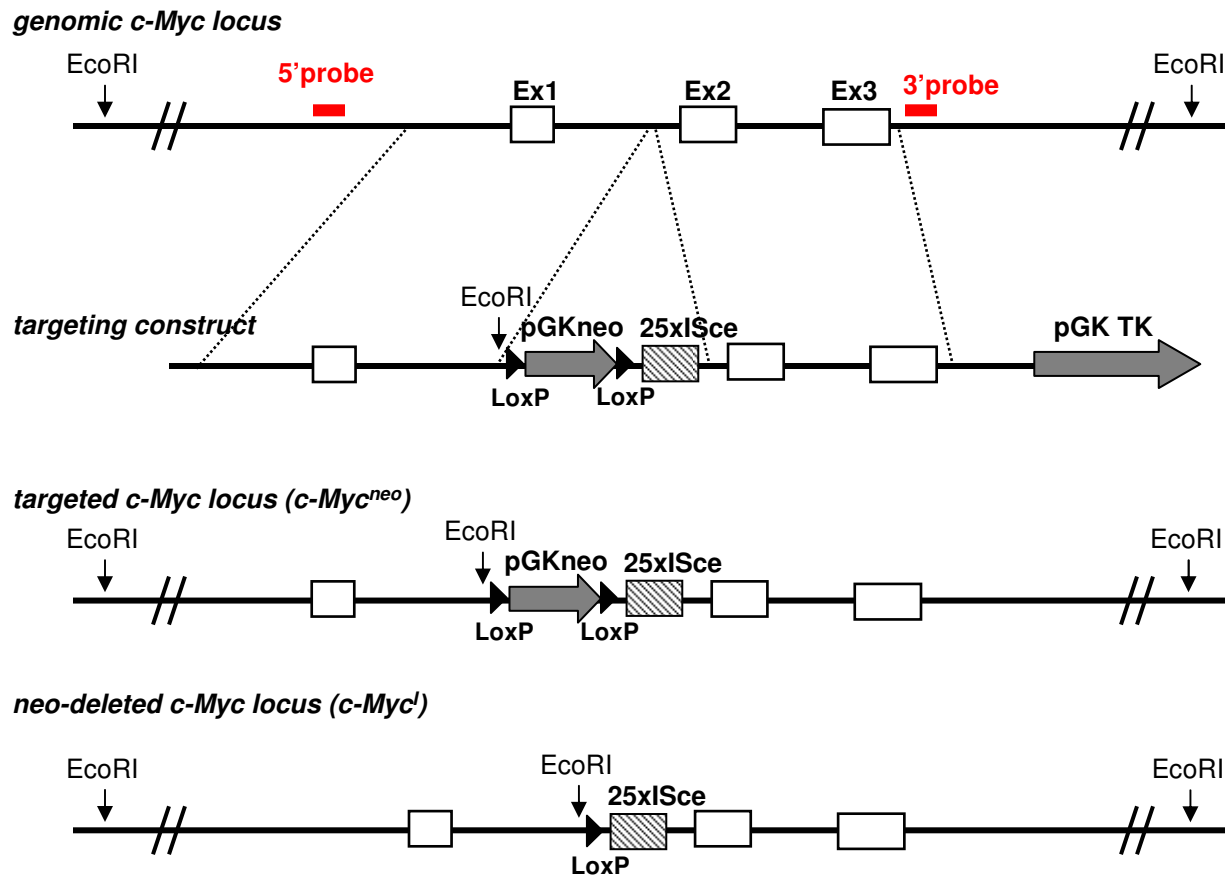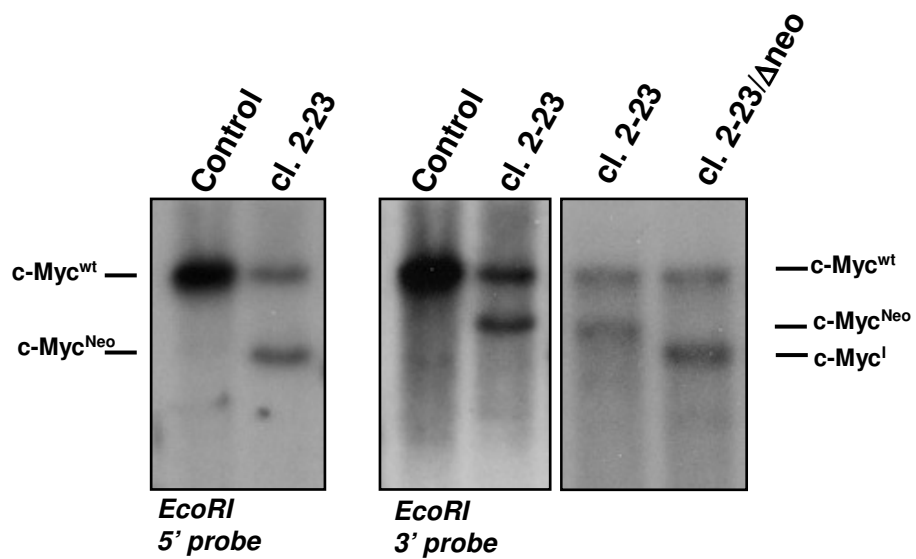

Supplementary Fig. 14

**a**

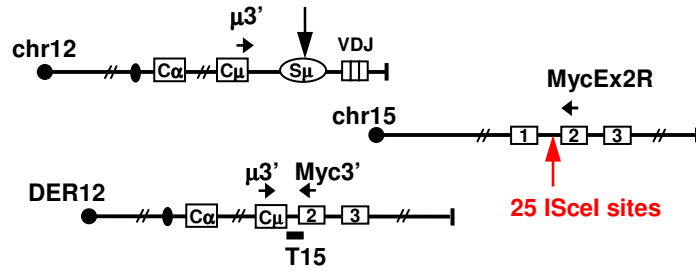

**b**

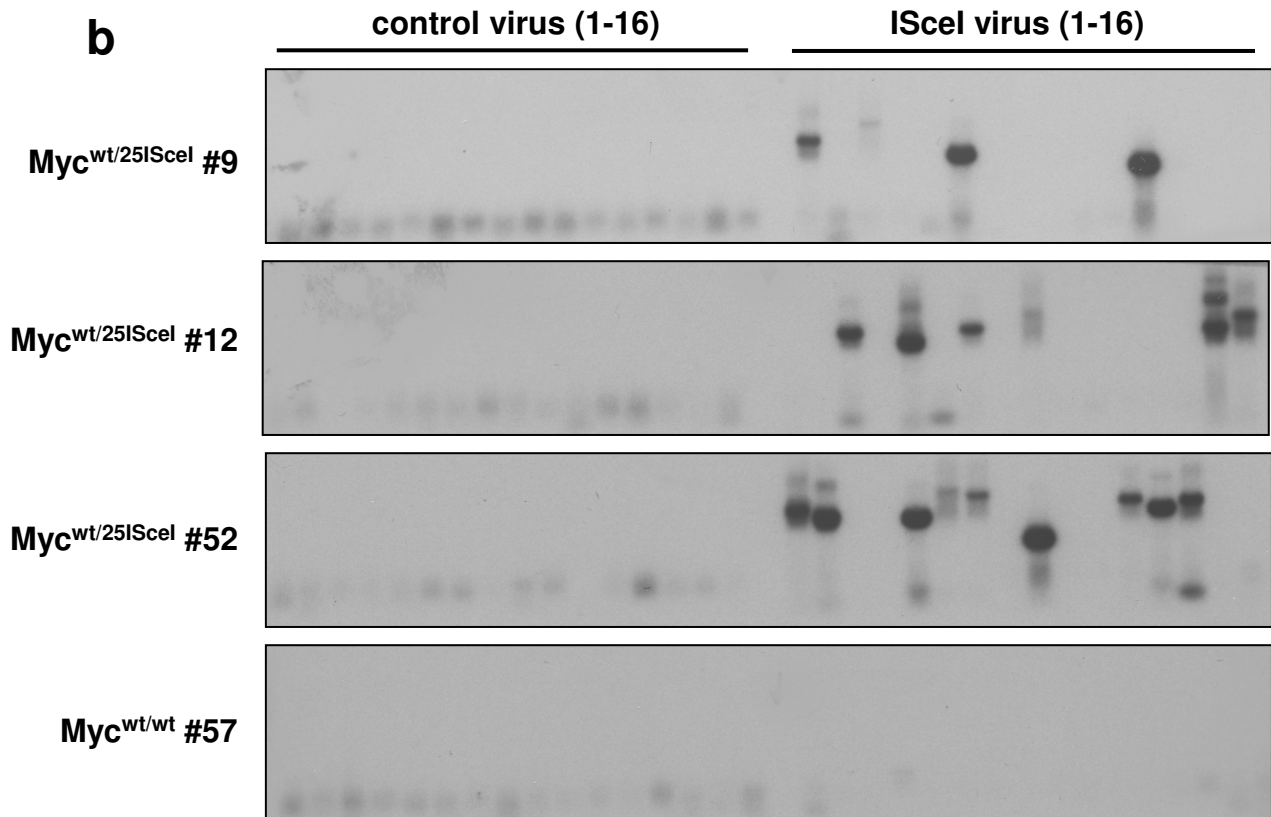

Supplementary Fig. 15a-b

**Supplementary Table 1. Frequency of IgH breaks in Xrcc4-deficient peripheral B cells activated with  $\alpha$ CD40/IL4 for 4 days**

| <b>Genotypes</b>    | <b>Number of Metaphases Analyzed</b> | <b>IgH Abnormalities</b> | <b>% of IgH Abnormalities</b> |
|---------------------|--------------------------------------|--------------------------|-------------------------------|
| control             | 51                                   | 1                        | 2                             |
| control             | 100                                  | 0                        | 0                             |
| control             | 100                                  | 0                        | 0                             |
| control             | 128                                  | 4                        | 3.125                         |
| control             | 120                                  | 1                        | 0.833                         |
| control             | 118                                  | 3                        | 2.542                         |
| $CX^{c/-}$          | 61                                   | 8                        | 13.1                          |
| $CX^{c/-}$          | 72                                   | 11                       | 15.3                          |
| $CX^{c/-}$          | 59                                   | 9                        | 15.3                          |
| $CX^{c/-}$          | 62                                   | 9                        | 14.5                          |
| $CX^{c/-}$          | 39                                   | 12                       | 20.8                          |
| $CX^{c/-}$          | 90                                   | 10                       | 11.1                          |
| $CX^{c/-}$          | 120                                  | 10                       | 8.3                           |
| $CX^{c/-}$          | 102                                  | 17                       | 16.7                          |
| $CX^{c/-}$          | 160                                  | 34                       | 21.3                          |
| $CX^{c/-}AID^{-/-}$ | 1658                                 | 1                        | 0.06                          |
| $CX^{c/-}AID^{-/-}$ | 1036                                 | 0                        | 0                             |
| $CX^{c/-}AID^{-/-}$ | 1245                                 | 1                        | 0.08                          |
| $CX^{c/-}AID^{-/-}$ | 1123                                 | 0                        | 0                             |
| $CX^{c/-}AID^{-/-}$ | 60                                   | 0                        | 0                             |
| $CX^{c/-}RAG2^c$    | 65                                   | 12                       | 18.5                          |
| $CX^{c/-}RAG2^c$    | 68                                   | 6                        | 8.8                           |
| $CX^{c/-}RAG2^c$    | 61                                   | 7                        | 11.5                          |
| $CX^{c/-}RAG2^c$    | 70                                   | 15                       | 21.4                          |
| $CX^{c/-}RAG2^c$    | 68                                   | 12                       | 17.6                          |
| $CX^{c/-}RAG2^c$    | 71                                   | 14                       | 19.7                          |
| $CX^{c/-}RAG2^c$    | 63                                   | 17                       | 27.0                          |
| $CX^{c/-}RAG2^c$    | 62                                   | 13                       | 21.0                          |

**Supplementary Table 2. General Genomic Instability Measured by Telomere-FISH**

| Genotype                                  | Number of metaphase analyzed | # with aberrations (%) | total aberrations (%) |
|-------------------------------------------|------------------------------|------------------------|-----------------------|
| <b>1<sup>st</sup> set of stimulations</b> |                              |                        |                       |
| Xc/c                                      | 40                           | 0 (0%)                 | 0 (0%)                |
| CXc/-                                     | 39                           | 17 (43.6%)             | 24 (61.5%)            |
| CXc/-p+/-AID-/-                           | 34                           | 9 (26.4%)              | 10 (29.4%)            |
| <b>2<sup>nd</sup> set of stimulations</b> |                              |                        |                       |
| Xc/c                                      | 45                           | 0 (0%)                 | 0 (0%)                |
| CXc/-                                     | 49                           | 23 (46.9%)             | 26 (53.1%)            |
| CXc/-p+/-AID-/-                           | 50                           | 17 (34.0%)             | 22 (44.0%)            |
| <b>3<sup>rd</sup> set of stimulations</b> |                              |                        |                       |
| Xc/c                                      | 50                           | 0 (0%)                 | 0 (0%)                |
| CXc/-                                     | 48                           | 17 (35.4%)             | 19 (39.6%)            |
| CXc/-p+/-AID-/-                           | 50                           | 12 (24.0%)             | 16 (32.0%)            |

Percent of aberrations are shown in parentheses (). Nomenclature: C=CD21cre; Xc=Xrcc4 floxed allele; P=p53. B Cells were stimulated with  $\alpha$ CD40/IL4 in the culture for 4 days.

**Supplementary Table 3. Frequency of Igλ breaks in Xrcc4-deficient peripheral B cells activated with αCD40/IL4 for 4 days**

| <b>Genotypes</b>                     | <b>Number of Metaphases Analyzed</b> | <b>Igλ Abnormalities</b> | <b>% of Igλ Abnormalities</b> |
|--------------------------------------|--------------------------------------|--------------------------|-------------------------------|
| control                              | 200                                  | 0                        | 0                             |
| control                              | 160                                  | 0                        | 0                             |
| control                              | 180                                  | 0                        | 0                             |
| control                              | 200                                  | 0                        | 0                             |
| control                              | 200                                  | 0                        | 0                             |
| control                              | 200                                  | 0                        | 0                             |
| control                              | 410                                  | 0                        | 0                             |
| control                              | 307                                  | 0                        | 0                             |
| control                              | 300                                  | 0                        | 0                             |
| control                              | 300                                  | 0                        | 0                             |
| control                              | 375                                  | 0                        | 0                             |
| CX <sup>c/-</sup>                    | 400                                  | 3                        | 0.75                          |
| CX <sup>c/-</sup>                    | 400                                  | 3                        | 0.75                          |
| CX <sup>c/-</sup>                    | 400                                  | 5                        | 1.25                          |
| CX <sup>c/-</sup>                    | 400                                  | 3                        | 0.75                          |
| CX <sup>c/-</sup>                    | 400                                  | 6                        | 1.5                           |
| CX <sup>c/-</sup>                    | 400                                  | 6                        | 1.5                           |
| CX <sup>c/-</sup>                    | 300                                  | 3                        | 1.0                           |
| CX <sup>c/-</sup>                    | 300                                  | 3                        | 1.0                           |
| CX <sup>c/-</sup>                    | 353                                  | 4                        | 1.13                          |
| CX <sup>c/-</sup>                    | 537                                  | 6                        | 1.12                          |
| CX <sup>c/-</sup>                    | 585                                  | 6                        | 1.03                          |
| CX <sup>c/-</sup> AID <sup>-/-</sup> | 447                                  | 5                        | 1.12                          |
| CX <sup>c/-</sup> AID <sup>-/-</sup> | 356                                  | 3                        | 0.84                          |
| CX <sup>c/-</sup> AID <sup>-/-</sup> | 322                                  | 4                        | 1.24                          |
| CX <sup>c/-</sup> RAG2 <sup>c</sup>  | 1118                                 | 2                        | 0.18                          |
| CX <sup>c/-</sup> RAG2 <sup>c</sup>  | 450                                  | 5                        | 1.11                          |
| CX <sup>c/-</sup> RAG2 <sup>c</sup>  | 450                                  | 3                        | 0.67                          |
| CX <sup>c/-</sup> RAG2 <sup>c</sup>  | 1053                                 | 0                        | 0.00                          |
| CX <sup>c/-</sup> RAG2 <sup>c</sup>  | 420                                  | 0                        | 0.00                          |
| CX <sup>c/-</sup> RAG2 <sup>c</sup>  | 608                                  | 2                        | 0.33                          |
| CX <sup>c/-</sup> RAG2 <sup>c</sup>  | 687                                  | 3                        | 0.44                          |
| CX <sup>c/-</sup> RAG2 <sup>c</sup>  | 558                                  | 2                        | 0.36                          |
| CX <sup>c/-</sup> p53 <sup>-/-</sup> | 200                                  | 1                        | 0.50                          |
| CX <sup>c/-</sup> p53 <sup>-/-</sup> | 120                                  | 4                        | 3.33                          |
| CX <sup>c/-</sup> p53 <sup>-/-</sup> | 200                                  | 3                        | 1.5                           |
| CX <sup>c/-</sup> p53 <sup>-/-</sup> | 200                                  | 2                        | 1.0                           |

**Supplementary Table 4. Frequency of Igκ breaks in Xrcc4-deficient peripheral B cells activated with αCD40/IL4 for 4 days**

| <b>Genotypes</b>                     | <b>Number of Metaphases Analyzed</b> | <b>Igκ Abnormalities</b> | <b>% of Igκ Abnormalities</b> |
|--------------------------------------|--------------------------------------|--------------------------|-------------------------------|
| control                              | 200                                  | 0                        | 0                             |
| control                              | 200                                  | 0                        | 0                             |
| control                              | 200                                  | 0                        | 0                             |
| control                              | 200                                  | 0                        | 0                             |
| control                              | 200                                  | 0                        | 0                             |
| control                              | 459                                  | 0                        | 0                             |
| control                              | 350                                  | 0                        | 0                             |
| control                              | 312                                  | 0                        | 0                             |
| control                              | 302                                  | 0                        | 0                             |
| control                              | 340                                  | 1                        | 0.29                          |
| CX <sup>c/-</sup>                    | 200                                  | 2                        | 1.0                           |
| CX <sup>c/-</sup>                    | 200                                  | 3                        | 1.5                           |
| CX <sup>c/-</sup>                    | 200                                  | 1                        | 0.5                           |
| CX <sup>c/-</sup>                    | 200                                  | 1                        | 0.5                           |
| CX <sup>c/-</sup>                    | 200                                  | 4                        | 2.0                           |
| CX <sup>c/-</sup>                    | 200                                  | 3                        | 1.5                           |
| CX <sup>c/-</sup>                    | 432                                  | 5                        | 1.16                          |
| CX <sup>c/-</sup>                    | 368                                  | 3                        | 0.82                          |
| CX <sup>c/-</sup>                    | 310                                  | 3                        | 0.97                          |
| CX <sup>c/-</sup>                    | 200                                  | 2                        | 1.0                           |
| CX <sup>c/-</sup>                    | 211                                  | 2                        | 0.95                          |
| CX <sup>c/-</sup> AID <sup>-/-</sup> | 424                                  | 5                        | 1.18                          |
| CX <sup>c/-</sup> AID <sup>-/-</sup> | 398                                  | 4                        | 1.01                          |
| CX <sup>c/-</sup> AID <sup>-/-</sup> | 385                                  | 3                        | 0.78                          |
| CX <sup>c/-</sup> RAG2 <sup>c</sup>  | 525                                  | 8                        | 1.52                          |
| CX <sup>c/-</sup> RAG2 <sup>c</sup>  | 450                                  | 5                        | 1.11                          |
| CX <sup>c/-</sup> RAG2 <sup>c</sup>  | 477                                  | 6                        | 1.26                          |
| CX <sup>c/-</sup> RAG2 <sup>c</sup>  | 454                                  | 5                        | 1.10                          |
| CX <sup>c/-</sup> RAG2 <sup>c</sup>  | 373                                  | 2                        | 0.54                          |
| CX <sup>c/-</sup> RAG2 <sup>c</sup>  | 416                                  | 2                        | 0.48                          |
| CX <sup>c/-</sup> RAG2 <sup>c</sup>  | 450                                  | 1                        | 0.22                          |
| CX <sup>c/-</sup> p53 <sup>-/-</sup> | 160                                  | 3                        | 1.88                          |
| CX <sup>c/-</sup> p53 <sup>-/-</sup> | 200                                  | 3                        | 1.5                           |
| CX <sup>c/-</sup> p53 <sup>-/-</sup> | 200                                  | 1                        | 0.5                           |

**Supplementary Table 5. Absence of Igκ and Igλ breaks in Xrcc4-deficient ES cells**

| <b>Genotypes</b> | <b>Number of Metaphases Analyzed</b> | <b>Igκ Abnormalities</b> | <b>Percentage(%)</b> |
|------------------|--------------------------------------|--------------------------|----------------------|
| control          | 345                                  | 0                        | 0                    |
| control          | 405                                  | 0                        | 0                    |
| Xrcc4-/-         | 582                                  | 0                        | 0                    |
| Xrcc4-/-         | 536                                  | 0                        | 0                    |
| Xrcc4-/-         | 428                                  | 0                        | 0                    |

  

| <b>Genotypes</b> | <b>Number of Metaphases Analyzed</b> | <b>Igλ Abnormalities</b> | <b>Percentage(%)</b> |
|------------------|--------------------------------------|--------------------------|----------------------|
| control          | 247                                  | 0                        | 0                    |
| control          | 420                                  | 0                        | 0                    |
| Xrcc4-/-         | 500                                  | 0                        | 0                    |
| Xrcc4-/-         | 306                                  | 0                        | 0                    |
| Xrcc4-/-         | 400                                  | 0                        | 0                    |

**Supplementary Table 6. Kinetics of Igλ and Igκ abnormalities in activated Xrcc4-deficient peripheral B cells**

| <b>Genotypes</b>  | <b>Number of Metaphases Analyzed</b> | <b>Igλ Abnormalities</b> | <b>% of Abnormalities</b> |
|-------------------|--------------------------------------|--------------------------|---------------------------|
| <b>day2</b>       |                                      |                          |                           |
| control           | 333                                  | 0                        | 0                         |
| control           | 300                                  | 0                        | 0                         |
| control           | 318                                  | 0                        | 0                         |
| CX <sup>c/-</sup> | 277                                  | 0                        | 0                         |
| CX <sup>c/-</sup> | 340                                  | 0                        | 0                         |
| CX <sup>c/-</sup> | 315                                  | 1                        | 0.317                     |
| CX <sup>c/-</sup> | 400                                  | 0                        | 0                         |
| CX <sup>c/-</sup> | 420                                  | 0                        | 0                         |
| <b>day3</b>       |                                      |                          |                           |
| control           | 400                                  | 0                        | 0                         |
| control           | 400                                  | 0                        | 0                         |
| control           | 397                                  | 0                        | 0                         |
| CX <sup>c/-</sup> | 400                                  | 3                        | 0.75                      |
| CX <sup>c/-</sup> | 400                                  | 2                        | 0.5                       |
| CX <sup>c/-</sup> | 279                                  | 1                        | 0.358                     |
| CX <sup>c/-</sup> | 319                                  | 1                        | 0.313                     |
| CX <sup>c/-</sup> | 335                                  | 2                        | 0.597                     |
| <b>Genotypes</b>  | <b>Number of Metaphases Analyzed</b> | <b>Igκ Abnormalities</b> | <b>% of Abnormalities</b> |
| <b>day2</b>       |                                      |                          |                           |
| control           | 389                                  | 0                        | 0                         |
| control           | 360                                  | 0                        | 0                         |
| control           | 428                                  | 0                        | 0                         |
| CX <sup>c/-</sup> | 457                                  | 2                        | 0.438                     |
| CX <sup>c/-</sup> | 427                                  | 0                        | 0                         |
| CX <sup>c/-</sup> | 865                                  | 6                        | 0.694                     |
| CX <sup>c/-</sup> | 462                                  | 3                        | 0.649                     |
| <b>day3</b>       |                                      |                          |                           |
| control           | 379                                  | 0                        | 0                         |
| control           | 310                                  | 0                        | 0                         |
| control           | 446                                  | 1                        | 0.224                     |
| CX <sup>c/-</sup> | 362                                  | 3                        | 0.829                     |
| CX <sup>c/-</sup> | 208                                  | 2                        | 0.962                     |
| CX <sup>c/-</sup> | 420                                  | 2                        | 0.476                     |
| CX <sup>c/-</sup> | 358                                  | 1                        | 0.279                     |
| CX <sup>c/-</sup> | 456                                  | 5                        | 1.096                     |
| CX <sup>c/-</sup> | 460                                  | 7                        | 1.522                     |



---

**Supplemental Table 7. Igλ Abnormalities in CXc/- B cells measured by 3D Interphase FISH**

---

|                   | <b>Number of<br/>Interphase Nuclei</b> | <b>Interphase nuclei With Igλ<br/>abnormalities</b> | <b>Interphase nuclei with Igλ<br/>abnormalities (%)</b> |
|-------------------|----------------------------------------|-----------------------------------------------------|---------------------------------------------------------|
| <b>day0</b>       |                                        |                                                     |                                                         |
| control           | 476                                    | 0                                                   | 0                                                       |
| control           | 577                                    | 0                                                   | 0                                                       |
| control           | 550                                    | 0                                                   | 0                                                       |
| CX <sup>c/-</sup> | 308                                    | 0                                                   | 0                                                       |
| CX <sup>c/-</sup> | 697                                    | 1                                                   | 0.14                                                    |
| CX <sup>c/-</sup> | 404                                    | 0                                                   | 0                                                       |
| <b>day4</b>       |                                        |                                                     |                                                         |
| control           | 284                                    | 1                                                   | 0.35                                                    |
| control           | 418                                    | 0                                                   | 0                                                       |
| control           | 376                                    | 0                                                   | 0                                                       |
| CX <sup>c/-</sup> | 250                                    | 6                                                   | 2.4                                                     |
| CX <sup>c/-</sup> | 340                                    | 3                                                   | 0.88                                                    |
| CX <sup>c/-</sup> | 322                                    | 5                                                   | 1.55                                                    |

---

**Supplemental Table 8. IgH-Igλ translocations measured by two color IgH-Igλ FISH on control or CX<sup>c/-</sup> B cells activated with αCD40/IL4 for 4 days**

| <b>Genotype</b>                      | <b>Total Metaphases analyzed</b> | <b>IgH-Igλ translocations</b> | <b>% of translocations</b> |
|--------------------------------------|----------------------------------|-------------------------------|----------------------------|
| control                              | 1515                             | 0                             | 0                          |
| control                              | 1591                             | 0                             | 0                          |
| CX <sup>c/-</sup>                    | 800                              | 1                             | 0.125                      |
| CX <sup>c/-</sup>                    | 1775                             | 3                             | 0.169                      |
| CX <sup>c/-</sup>                    | 1477                             | 4                             | 0.271                      |
| CX <sup>c/-</sup>                    | 1634                             | 3                             | 0.184                      |
| CX <sup>c/-</sup> AID <sup>-/-</sup> | 1658                             | 0                             | 0                          |
| CX <sup>c/-</sup> AID <sup>-/-</sup> | 1036                             | 0                             | 0                          |
| CX <sup>c/-</sup> AID <sup>-/-</sup> | 1245                             | 0                             | 0                          |
| CX <sup>c/-</sup> AID <sup>-/-</sup> | 1123                             | 0                             | 0                          |

**Supplementary Table 9. Igλ-IgH co-localization in X<sup>c/c</sup> and CX<sup>c/-</sup> B cells and other cell types measured by 3D interphase FISH**

| <b>Genotypes</b>          | <b>Number of interphase nuclei analyzed</b> | <b>Nuclei with Igλ-IgH co-localized</b> | <b>Percentage of nuclei with co-localization</b> |
|---------------------------|---------------------------------------------|-----------------------------------------|--------------------------------------------------|
| <b>Day0-IgH-Igλ</b>       |                                             |                                         |                                                  |
| Control B cells           | 108                                         | 14                                      | 12.96%                                           |
| CX <sup>c/-</sup> B cells | 109                                         | 15                                      | 13.76%                                           |
| Control B cells           | 122                                         | 19                                      | 15.6%                                            |
| CX <sup>c/-</sup> B cells | 127                                         | 17                                      | 13.4%                                            |
| Control B cells           | 104                                         | 13                                      | 12.5%                                            |
| CX <sup>c/-</sup> B cells | 111                                         | 16                                      | 14.4%                                            |
| <b>15min-IgH-Igλ</b>      |                                             |                                         |                                                  |
| Wt B cells                | 105                                         | 10                                      | 9.52%                                            |
| Wt B cells                | 112                                         | 11                                      | 9.82%                                            |
| Wt B cells                | 126                                         | 14                                      | 11.11%                                           |
| Wt thy                    | 291                                         | 2                                       | 0.69%                                            |
| Wt thy                    | 139                                         | 0                                       | 0%                                               |
| Wt thy                    | 122                                         | 2                                       | 1.64%                                            |
| ES cells                  | 217                                         | 1                                       | 0.46%                                            |
| ES cells                  | 144                                         | 0                                       | 0%                                               |
| ES cells                  | 140                                         | 0                                       | 0%                                               |

Co-localization: IgH and Igλ signals (<0.5μm), only mono-allelic *IgH* and *Igλ* associations were observed and no nuclei contained co-localized signals for both *IgH* and *Igλ* alleles (not shown).

**Supplementary Table 10. Igλ-IgH co-localization in activated control and CX<sup>c/-</sup> B cells measured by 3D interphase FISH**

| <b>Genotypes</b>          | <b>Number of interphase nuclei analyzed</b> | <b>Nuclei with Igλ-IgH co-localized</b> | <b>Percentage of nuclei with co-localization</b> |
|---------------------------|---------------------------------------------|-----------------------------------------|--------------------------------------------------|
| <b>Day3.5-IgH-Igλ</b>     |                                             |                                         |                                                  |
| Control B cells           | 113                                         | 11                                      | 9.73%                                            |
| CX <sup>c/-</sup> B cells | 120                                         | 14                                      | 11.67%                                           |
| CX <sup>c/-</sup> B cells | 112                                         | 9                                       | 8.04%                                            |
| Control B cells           | 131                                         | 9                                       | 6.87%                                            |
| CX <sup>c/-</sup> B cells | 105                                         | 5                                       | 4.76%                                            |
| Control B cells           | 201                                         | 10                                      | 4.98%                                            |
| CX <sup>c/-</sup> B cells | 114                                         | 6                                       | 5.26%                                            |
| <b>Day3.5-IgH-C2</b>      |                                             |                                         |                                                  |
| Control B cells           | 122                                         | 1                                       | 0.82%                                            |
| CX <sup>c/-</sup> B cells | 110                                         | 0                                       | 0%                                               |
| Control B cells           | 107                                         | 1                                       | 0.93%                                            |
| CX <sup>c/-</sup> B cells | 132                                         | 2                                       | 1.52%                                            |
| Control B cells           | 189                                         | 4                                       | 2.12%                                            |
| CX <sup>c/-</sup> B cells | 113                                         | 1                                       | 0.88%                                            |
| <b>Day3.5-IgH-K10</b>     |                                             |                                         |                                                  |
| Control B cells           | 120                                         | 2                                       | 1.67%                                            |
| CX <sup>c/-</sup> B cells | 111                                         | 1                                       | 0.9%                                             |
| Control B cells           | 123                                         | 1                                       | 0.81%                                            |
| CX <sup>c/-</sup> B cells | 125                                         | 0                                       | 0%                                               |
| Control B cells           | 103                                         | 1                                       | 0.97%                                            |
| CX <sup>c/-</sup> B cells | 123                                         | 2                                       | 1.63%                                            |

**Supplementary Table 11. IgH-chr16 control loci co-localization in  $X^{c/c}$  and  $CX^{c/-}$  B cells and other cell types by Interphase FISH**

| <b>Genotype</b>     | <b>Number of interphase nuclei analyzed</b> | <b>Nuclei with IgH-control loci co-localized</b> | <b>Percentage of nuclei with co-localization</b> |
|---------------------|---------------------------------------------|--------------------------------------------------|--------------------------------------------------|
| <b>Day0-IgH-C2</b>  |                                             |                                                  |                                                  |
| Control B cells     | 202                                         | 3                                                | 1.49%                                            |
| $CX^{c/-}$ B cells  | 152                                         | 2                                                | 1.32%                                            |
| Control B cells     | 141                                         | 3                                                | 2.13%                                            |
| $CX^{c/-}$ B cells  | 104                                         | 1                                                | 0.96%                                            |
| Control B cells     | 167                                         | 3                                                | 1.80%                                            |
| $CX^{c/-}$ B cells  | 178                                         | 2                                                | 1.12%                                            |
| <b>Day0-IgH-K10</b> |                                             |                                                  |                                                  |
| Control B cells     | 144                                         | 6                                                | 4.17%                                            |
| $CX^{c/-}$ B cells  | 154                                         | 4                                                | 2.6%                                             |
| Control B cells     | 131                                         | 6                                                | 4.58%                                            |
| $CX^{c/-}$ B cells  | 191                                         | 7                                                | 3.66%                                            |
| Control B cells     | 103                                         | 3                                                | 2.91%                                            |
| $CX^{c/-}$ B cells  | 162                                         | 10                                               | 6.17%                                            |
| $CX^{c/-}$ B cells  | 143                                         | 5                                                | 3.50%                                            |
| <b>IgH-C2</b>       |                                             |                                                  |                                                  |
| Wt thymocytes       | 153                                         | 1                                                | 0.65%                                            |
| Wt thymocytes       | 136                                         | 2                                                | 1.47%                                            |
| Wt thymocytes       | 146                                         | 3                                                | 2.05%                                            |
| <b>IgH-K10</b>      |                                             |                                                  |                                                  |
| Wt thymocytes       | 130                                         | 5                                                | 3.85%                                            |
| Wt thymocytes       | 141                                         | 8                                                | 5.67%                                            |
| Wt thymocytes       | 108                                         | 3                                                | 2.78%                                            |

Co-localization: IgH and control BACs signals (<0.5 $\mu$ m), only one allele with associated signals, no nuclei has both alleles co-localized

**Supplementary Table 12. Igκ-IgH co-localization in control and CX<sup>c/-</sup> B cells and other cell types by 3D Interphase FISH**

| <b>Genotype</b>             | <b>Number of Interphase nuclei</b> | <b>Nuclei with Igκ-IgH co-localized</b> | <b>Percentage of nuclei with co-localization</b> |
|-----------------------------|------------------------------------|-----------------------------------------|--------------------------------------------------|
| <b>Day0-B cells IgH-Igκ</b> |                                    |                                         |                                                  |
| Control B cells             | 227                                | 8                                       | 3.52%                                            |
| CX <sup>c/-</sup> B cells   | 225                                | 15                                      | 6.67%                                            |
| Control B cells             | 216                                | 13                                      | 6.02%                                            |
| CX <sup>c/-</sup> B cells   | 248                                | 12                                      | 4.84%                                            |
| Control B cells             | 213                                | 12                                      | 5.63%                                            |
| CX <sup>c/-</sup> B cells   | 116                                | 5                                       | 4.31%                                            |
| Wt thymocytes               | 0                                  | 3                                       | 0.96%                                            |
| Wt thymocytes               | 220                                | 2                                       | 0.91%                                            |
| Wt thymocytes               | 311                                | 8                                       | 2.57%                                            |
| Wt thymocytes               | 360                                | 1                                       | 0.28%                                            |
| ES cells                    | 151                                | 1                                       | 0.66%                                            |
| ES cells                    | 130                                | 0                                       | 0%                                               |
| ES cells                    | 165                                | 0                                       | 0%                                               |
| <b>Genotype</b>             | <b>Number of Interphase nuclei</b> | <b>Nuclei with IgH-F6 co-localized</b>  | <b>Percentage of nuclei with co-localization</b> |
| <b>Day0-B cells IgH-F6</b>  |                                    |                                         |                                                  |
| Control                     | 223                                | 4                                       | 1.79%                                            |
| CX <sup>c/-</sup>           | 210                                | 2                                       | 0.95%                                            |
| Control                     | 232                                | 1                                       | 0.43%                                            |
| CX <sup>c/-</sup>           | 162                                | 2                                       | 1.23%                                            |
| Control                     | 113                                | 1                                       | 0.88%                                            |
| CX <sup>c/-</sup>           | 169                                | 1                                       | 0.59%                                            |
| Wt thymocyte                | 306                                | 2                                       | 0.65%                                            |
| Wt thymocyte                | 222                                | 2                                       | 0.90%                                            |
| Wt thymocyte                | 108                                | 1                                       | 0.93%                                            |
| Wt thymocyte                | 361                                | 0                                       | 0%                                               |
| <b>Genotype</b>             | <b>Number of Interphase nuclei</b> | <b>Nuclei with IgH-I9 co-localized</b>  | <b>Percentage of nuclei with co-localization</b> |
| <b>Day0-B cells IgH-I9</b>  |                                    |                                         |                                                  |
| Control                     | 240                                | 5                                       | 2.08%                                            |
| CX <sup>c/-</sup>           | 231                                | 2                                       | 0.87%                                            |
| Control                     | 136                                | 2                                       | 1.47%                                            |
| CX <sup>c/-</sup>           | 202                                | 3                                       | 1.49%                                            |
| control                     | 152                                | 2                                       | 1.32%                                            |
| CX <sup>c/-</sup>           | 176                                | 0                                       | 0%                                               |
| Wt thymocyte                | 323                                | 3                                       | 0.93%                                            |
| Wt thymocyte                | 181                                | 4                                       | 2.21%                                            |
| Wt thymocyte                | 121                                | 2                                       | 1.65%                                            |
| Wt thymocyte                | 458                                | 1                                       | 0.22%                                            |

**Supplementary Table 13. IgH-cmyc co-localization in B cells and other cell types by 3D Interphase FISH**

|                                      | <b>Number of Interphase nuclei</b> | <b>Nuclei with Signals co-localized</b> | <b>Percentage of nuclei with co-localization</b> |
|--------------------------------------|------------------------------------|-----------------------------------------|--------------------------------------------------|
| <b>Day0-B cells IgH-cmyc</b>         |                                    |                                         |                                                  |
| Control B cells                      | 115                                | 5                                       | 4.35%                                            |
| CX <sup>c/-</sup> B cells            | 108                                | 4                                       | 3.70%                                            |
| Control B cells                      | 143                                | 9                                       | 6.29%                                            |
| CX <sup>c/-</sup> B cells            | 137                                | 11                                      | 8.03%                                            |
| Control B cells                      | 103                                | 5                                       | 4.85%                                            |
| CX <sup>c/-</sup> B cells            | 188                                | 8                                       | 4.26%                                            |
| <b>Other cell types for IgH-cmyc</b> |                                    |                                         |                                                  |
| ES cells                             | 126                                | 0                                       | 0%                                               |
| ES cells                             | 145                                | 0                                       | 0%                                               |
| ES cells                             | 155                                | 0                                       | 0%                                               |
| <b>15 mins activation</b>            |                                    |                                         |                                                  |
| Wt B cells                           | 120                                | 6                                       | 5.00%                                            |
| Wt B cells                           | 160                                | 7                                       | 4.38%                                            |
| Wt B cells                           | 140                                | 5                                       | 3.57%                                            |
| <b>Day3.5-IgH-cmyc</b>               |                                    |                                         |                                                  |
| Control B cells                      | 112                                | 5                                       | 4.46%                                            |
| CX <sup>c/-</sup> B cells            | 108                                | 4                                       | 3.70%                                            |
| Control B cells                      | 267                                | 10                                      | 3.75%                                            |
| CX <sup>c/-</sup> B cells            | 156                                | 4                                       | 2.56%                                            |
| Control B cells                      | 174                                | 7                                       | 4.02%                                            |
| CX <sup>c/-</sup> B cells            | 128                                | 6                                       | 4.69%                                            |

**Supplementary Table 14. No c-myc abnormalities detected in activated Xrcc4-deficient B cells by two color FISH**

| Genotypes         | Number of mice | Number of Metaphases Analyzed | Metaphase With c-myc abnormalities | % of c-myc Abnormalities |
|-------------------|----------------|-------------------------------|------------------------------------|--------------------------|
| Control           | 2              | 1074                          | 0                                  | 0                        |
| CX <sup>c/-</sup> | 3              | 1155                          | 0                                  | 0                        |

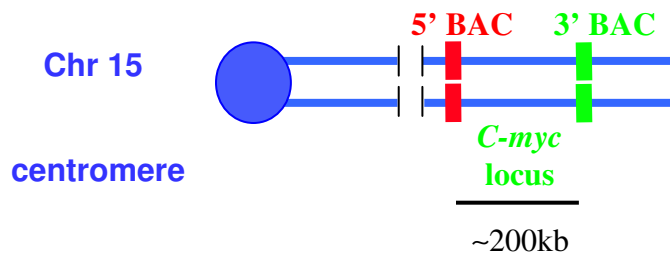



**Supplementary Table 15. Kinetics of IgH-cmyc translocations in Xrcc4-deficient peripheral B cells**

| <b>Genotype</b>                      | <b>Day</b> | <b>Exp1</b>          | <b>Exp2</b>         | <b>Exp3</b>       | <b>Total IgH/c-myc translocations/cell#</b> | <b>Frequency of Translocations (<math>\times 10^{-6}</math>)</b> |
|--------------------------------------|------------|----------------------|---------------------|-------------------|---------------------------------------------|------------------------------------------------------------------|
| control                              | 4          | 0/8 $\times 10^5$    | 0/8 $\times 10^5$   | 0/8 $\times 10^5$ | 0/2.4 $\times 10^6$                         | <0.4                                                             |
| control                              | 4          | 0/8 $\times 10^5$    | 0/8 $\times 10^5$   |                   | 0/1.6 $\times 10^5$                         | <0.8                                                             |
| control                              | 4          | 0/6 $\times 10^5$    | 1/1.2 $\times 10^6$ | 1/9 $\times 10^5$ | 2/2.7 $\times 10^6$                         | 0.7                                                              |
| control                              | 4          | 1/1.2 $\times 10^6$  | 1/0.8 $\times 10^5$ |                   | 2/2 $\times 10^6$                           | 1                                                                |
| CX <sup>c/-</sup>                    | 4          | 6/1.6 $\times 10^6$  | 7/8 $\times 10^5$   |                   | 13/2.4 $\times 10^6$                        | 5.4                                                              |
| CX <sup>c/-</sup>                    | 4          | 1/8 $\times 10^5$    | 1/1.6 $\times 10^6$ |                   | 2/2.4 $\times 10^6$                         | 0.8                                                              |
| CX <sup>c/-</sup>                    | 4          | 6/1.2 $\times 10^6$  | 3/8 $\times 10^5$   |                   | 9/2 $\times 10^6$                           | 4.5                                                              |
| CX <sup>c/-</sup>                    | 4          | 13/2.4 $\times 10^6$ | 5/8 $\times 10^5$   |                   | 18/3.2 $\times 10^6$                        | 5.6                                                              |
| <b>Genotype</b>                      | <b>Day</b> | <b>Exp1</b>          | <b>Exp2</b>         | <b>Exp3</b>       | <b>Total IgH/c-myc translocations/cell#</b> | <b>Frequency of Translocations (<math>\times 10^{-6}</math>)</b> |
| CX <sup>c/-</sup> -RAG2 <sup>o</sup> | 2          | 0/6 $\times 10^5$    | 1/1 $\times 10^6$   | 0/6 $\times 10^5$ | 1/2.2 $\times 10^6$                         | 0.4                                                              |
| CX <sup>c/-</sup> -RAG2 <sup>o</sup> | 3          | 4/6 $\times 10^5$    | 5/1 $\times 10^6$   | 4/6 $\times 10^5$ | 13/2.2 $\times 10^6$                        | 5.9                                                              |
| CX <sup>c/-</sup> -RAG2 <sup>o</sup> | 4          | 2/6 $\times 10^5$    | 11/1 $\times 10^6$  | 9/6 $\times 10^5$ | 22/2.2 $\times 10^6$                        | 10                                                               |
| CX <sup>c/-</sup> -RAG2 <sup>o</sup> | 2          | 1/6 $\times 10^5$    | 1/1 $\times 10^6$   | 0/6 $\times 10^5$ | 2/2.2 $\times 10^6$                         | 0.9                                                              |
| CX <sup>c/-</sup> -RAG2 <sup>o</sup> | 3          | 1/6 $\times 10^5$    | 4/1 $\times 10^6$   | 4/6 $\times 10^5$ | 9/2.2 $\times 10^6$                         | 4.1                                                              |
| CX <sup>c/-</sup> -RAG2 <sup>o</sup> | 4          | 5/6 $\times 10^5$    | 9/1 $\times 10^6$   | 8/6 $\times 10^5$ | 22/2.2 $\times 10^6$                        | 10                                                               |

**Supplementary Table 16. c-myc breaks and IgH/c-myc translocation in IScel targeted B cells**

| Genotype                     | Retroviral vector | C-myc breaks |          |          | IgH/c-myc translocations |                 |                              |
|------------------------------|-------------------|--------------|----------|----------|--------------------------|-----------------|------------------------------|
|                              |                   | # Cells      | # breaks | % breaks | # Cells                  | # translocation | Transl/10 <sup>6</sup> cells |
| <b>c-myc<sup>l/wt</sup></b>  | control           | 107          | 0        | 0.0      | 1.38x10 <sup>6</sup>     | 0               | 0                            |
|                              | IScel             | 96           | 9        | 9.4      | 2.4x10 <sup>5</sup>      | 12              | 50                           |
| <b>c-myc<sup>l/wt</sup></b>  | control           | 110          | 0        | 0.0      | 8.0x10 <sup>5</sup>      | 0               | 0                            |
|                              | IScel             | 105          | 6        | 5.7      | 8.0x10 <sup>4</sup>      | 5               | 62.5                         |
| <b>c-myc<sup>l/wt</sup></b>  | control           | 112          | 0        | 0.0      | 8.0x10 <sup>5</sup>      | 0               | 0                            |
|                              | IScel             | 107          | 14       | 13.1     | 8.0x10 <sup>4</sup>      | 9               | 112.5                        |
| <b>c-myc<sup>l/wt</sup></b>  | control           | 108          | 1        | 0.9      | ND                       | ND              | ND                           |
|                              | IScel             | 110          | 11       | 10.0     | ND                       | ND              | ND                           |
| <b>c-myc<sup>wt/wt</sup></b> | control           | 106          | 0        | 0.0      | 8.0x10 <sup>5</sup>      | 0               | 0                            |
|                              | IScel             | 112          | 0        | 0.0      | 8.0x10 <sup>4</sup>      | 0               | 0                            |

## SUPPLEMENTARY FIGURE LEGENDS

**Suppl. Figure 1. Overview of V(D)J recombination, receptor editing, and IgH CSR in B cells.**

**a**, Diagram of Primary and Secondary V(D)J recombination during B cell development. See text for details. **b**, Diagram of IgH V(D)J recombination and CSR. See text for details.

**Suppl. Figure 2. Distribution of different types of *Igλ* and *Igκ* abnormalities in activated *CX<sup>c/-</sup>* or *CXP* splenic B cells.**

The bar graphs show the distribution of the different types of *Igκ* and *Igλ* aberrations found in 4 day  $\alpha$ CD40/IL4-activated *CX<sup>c/-</sup>* or *CXP* splenic B cells categorized as the proportion of metaphases with either breaks alone, breaks plus translocations, or translocations alone.

**Suppl. Figure 3. Kinetics of *Igκ* and *Igλ* breaks in activated *CX<sup>c/-</sup>* splenic B cells.**

Metaphases prepared from day 2, day 3 or day 4  $\alpha$ CD40/IL4-activated splenic B cells were analyzed via two-color FISH using *Igκ* or *Igλ* BAC probes as outlined in Figure 1. At least three mice were analyzed for each point (see Suppl. Table 6 for raw data). Data are presented as mean  $\pm$  s.e.m.

**Suppl. Figure 4. Representative *Igλ* abnormalities visualized by 3D interphase FISH.**

Interphase nuclei were isolated from day 4  $\alpha$ CD40/IL4-activated *CX<sup>c/-</sup>* splenic B cells and analyzed by 3D FISH using 5' (red) and 3' (green) *Igλ* BAC probes as outlined in Figure 1d. Representative images with isolated centromeric or telomeric signals are shown. Among 14 *Igλ* locus breaks scored, 3 had split signals (the distance between green and red signals greater than 1.5 $\mu$ m), 3 had isolated red signals only, and 8 had isolated green signals only.

**Suppl. Figure 5. *Igκ* and *Igλ* abnormalities in activated *CX<sup>c/-</sup>* splenic B cells are not initiated by AID.**

Metaphases from  $\alpha$ CD40/IL4-activated splenic B cells (day 4) were analyzed by FISH for hybridization to *Igκ* or *Igλ* probes as outlined in Figure 1. Representative *Igκ* or *Igλ* breaks and translocations in *CX<sup>c/-</sup>AID<sup>-/-</sup>* splenic B cells are shown.

**Suppl. Figure 6. Deletion of RAG conditional alleles in resting and activated splenic**

***CX<sup>cl-/-</sup>RAG<sup>c</sup>* B cells.**

DNA samples were prepared from day 0, day 3, or day 4  $\alpha$ CD40/IL4-activated *CX<sup>cl-/-</sup>RAG<sup>c/-</sup>* B cells and from kidney (Kid) as a control. Genomic DNA was digested with *Stu*I and hybridized with a 5' RAG2 probe.

**Suppl. Figure 7. Lack of *Ig $\kappa$*  and *Ig $\lambda$*  breaks or translocations in the same *CX<sup>cl-/-</sup>* metaphases.**

Metaphases from  $\alpha$ CD40/IL4-activated *CX<sup>cl-/-</sup>* B cells (day 4) were analyzed by sequential FISH hybridization first with 5' and 3' *Ig $\kappa$*  probes and then 5' and 3' *Ig $\lambda$*  probes as indicated.

**Upper:** Representative metaphases with an intact *Ig $\kappa$*  locus and a broken/translocated *Ig $\lambda$*  locus in *CX<sup>cl-/-</sup>* splenic B cells are shown. **Bottom:** Quantification of these sequential FISH analyses.

**Suppl. Figure 8. Increased *J $\kappa$ -C $\kappa$*  deletion in metaphases harboring *Ig $\lambda$*  abnormalities.**

Metaphases prepared from day 4  $\alpha$ CD40/IL-4 activated wt (n=2) or *CX<sup>cl-/-</sup>* (n=3) splenic B cells were first analyzed via two color FISH to identify those with *Ig $\lambda$*  breaks and translocations. Subsequently the *Ig $\lambda$*  signals were stripped and the metaphases were assayed by two color FISH using a 5' *Ig $\kappa$*  BAC probe (to identify chromosome 6 in the region of *Ig $\kappa$* ) and a *J $\kappa$ -C $\kappa$*  probe (indicated in the schematic map of *Ig $\kappa$*  locus) to assay for *Ig $\kappa$*  specific deletions. **Upper:** Bar graph showing that metaphases from wt B cells (n=207) have an intact *Ig $\kappa$*  locus in greater than 90% (open bars) while nearly 50% of metaphases from *CX<sup>cl-/-</sup>* B cells with *Ig $\lambda$*  abnormalities (n=21) (black bars) had deletions of the *C $\kappa$*  region on either one or both alleles (scored as absence of *J $\kappa$ -C $\kappa$*  probe signal on the chromosome carrying the 5' *Ig $\kappa$*  signal). **Bottom:** Map of *Ig $\kappa$*  locus showing position of *J $\kappa$ -C $\kappa$*  probe and indicating potential mechanisms for *Ig $\kappa$*  deletions via rearrangements to 3'RS.

**Suppl. Figure 9. Frequent *IgH* and *Ig $\lambda$*  abnormalities in activated *CX<sup>cl-/-</sup>* peripheral B cells.**

**a,** Shown is an example of a metaphase with an *Ig $\kappa$*  break joined to an *IgH* break. **Left:** *Ig $\kappa$*  FISH shows a chromosomal translocation involving *Ig $\kappa$* . Sequential hybridizations of the same metaphase with chromosome 12 and chromosome 6 paints (**center**) followed by *IgH* FISH (**right**) revealed a translocation involving chromosome 12 (red) and chromosome 6 (green) with

3'*IgH* and 3'*Igκ* sequences at the breakpoint. **b, Upper:** Diagram of *Igλ* and *IgH* probes. **Lower:** Examples of metaphases with simultaneous *Igλ* and *IgH* breaks, as revealed by sequential *Igλ* FISH followed by *IgH* FISH. **Metaphase 1:** The broken *Igλ* locus (3'*Igλ* probe, red signal, left panel) is joined to a broken *IgH* locus (3'*IgH* probe, green signal, right panel) to form a dicentric chromosome, while the telomeric portion of chromosome 16 (5'*Igλ* probe, green signal, left panel) is fused with the telomeric portion of chromosome 12 (5'*IgH* probe, red signal, right panel) in an acentric fragment. The other chromosome 12 in the same metaphase is also involved in formation of a dicentric chromosome, which is only positive for the 3'*IgH* probe (green signal, right panel). **Metaphase 2:** Both the *IgH* and the *Igλ* loci are broken; and the chromosomal fragments containing the 5'*Igλ* probe (green, left panel) and the 5'*IgH* probe (red, right panel) are involved in translocations with different chromosomes. **Metaphase 3:** The *Igλ* locus is broken, with the 5'*Igλ* probe (green) joined to another chromosome to form a translocation (left panel), whereas the *IgH* locus is intact (right panel). **c,** Example is shown of a metaphase with an *Igλ* break joined to *IgH* break. Sequential hybridization of the same metaphase with *Igλ* probes, chromosome 12 and chromosome 16 paints and *IgH* probes revealed the telomeric portion of chromosome 16, containing the 5'*Igλ* probe (green, left panel) joined to the centromeric portion of chromosome 12, containing the 3'*IgH* probe (red, right panel).

**Suppl. Figure 10. PCR assay to detect *IgH/Igλ* translocations in day 4 activated control and *CX<sup>c/-</sup>* splenic B cells.**

**a,** Schematic representation of the PCR assay used for *IgH/Igλ* translocations. Primers used to detect chromosome 12/16 translocations are represented as horizontal black arrows. The internal oligonucleotide probe used in Southern blot experiments is shown as a horizontal black bar. **b,** Representative Southern blots with the *IgH* or *JλI* probe are shown for activated control, *CX<sup>c/-</sup>* and *CX<sup>c/-</sup>A<sup>-/-</sup>* peripheral B cells (day 4 of αCD40/IL4 activation). No *IgH/Igλ* translocation was detected in  $1.5 \times 10^6$  cells from *CX<sup>c/-</sup>A<sup>-/-</sup>* mice. In each reaction DNA from ~20000 cells was used.

**Suppl. Figure 11. Sequence analyses of junctions of *IgH/Igλ* translocations.**

*IgH/Igλ* translocations were cloned from 4 day  $\alpha$ CD40/IL4-activated  $CX^{c/-}$  (n=3) B cells by PCR. Sequences are aligned with genomic *IgH* (AJ851868) or *Igλ* (NG\_004051) locus sequences. Mutations, insertions, or deletion were found in the S $\mu$  regions (underlined). Microhomology at the junctions is underlined.

**Suppl. Figure 12. Spatial proximity of *IgH* and *Igκ***

The 3' *IgH* probe and one of the three indicated *Igκ* region probes (F6, Igκ, I9) (diagrammed in lower panel) were used for 3D interphase FISH on control or  $CX^{c/-}$  peripheral B cell nuclei. The bar graph in the upper panel shows the percentage of nuclei in which the 3'*IgH* was found co-localized (closer than 0.5 $\mu$ m) with each of the *Igκ* regions as indicated. At least three mice were analyzed for each point (see Suppl. Table 12). The percentage of co-localization is presented as mean  $\pm$  s.e.m based on results of at least 3 different experiments per sample.

**Suppl. Figure 13. PCR assay to detect *IgH/c-myc* translocations in day 4 activated control and  $CX^{c/-}$  splenic B cells.**

**a**, Schematic representation of the PCR assay used for *IgH/c-myc* translocations. Primers used to detect derivative chromosome 12 (der12) translocations are represented as horizontal black arrows. The internal oligonucleotide probe used in Southern blot experiments is shown as a horizontal black bar (T13). **b**, Representative Southern blots with the T13 probe are shown for activated control and  $CX^{c/-}$  peripheral B cells (day 4 of  $\alpha$ CD40/IL4). In each reaction DNA from 100000 or 50000 cells was used (see Suppl. Table 15). **c**, Representative Southern blots with T13 probe are shown for activated control and  $CX^{c/-}$ RAG2<sup>c</sup> splenic B cells at day 2 and day 3 of activation with  $\alpha$ CD40/IL4. Each reaction used DNA from 50000 cells.

**Suppl. Figure 14. Gene targeting strategy and Southern blot analyses of *c-myc*<sup>25ISceI</sup> allele.**

**Top Diagram:** Schematic maps of the targeting strategy for insertion of 25 ISceI sites into the 1<sup>st</sup> intron of *c-myc* locus. The position of the 5' and 3' probes used for ES cell screening are shown in red. **Bottom Panels:** Southern blot analysis of a targeted clone before and after Neo cassette deletion.

**Suppl. Figure 15. PCR assay to detect *IgH/c-myc* translocations in day 4-activated *c-***

***myc*<sup>25Iscel/wt</sup> splenic B cells infected with control or ISceI virus.**

**a,** Schematic representation of the PCR assay used for *IgH/c-myc* translocations. Primers used to detect derivative chromosome 12 (der12) translocations are represented as horizontal black arrows. The internal oligonucleotide probe used in Southern blot experiments is shown as a horizontal black bar (T15). **b,** Representative Southern blots with the T15 probe are shown for activated *c-myc*<sup>25Iscel/wt</sup> and *c-myc*<sup>wt/wt</sup> peripheral B cells (day 4 of  $\alpha$ CD40/IL4) infected with either control or ISceI virus. In each reaction, DNA from 50000 (control-infected samples) or 5000 (ISceI-infected samples) cells was used (see Suppl. Table 16).

## ONLINE METHODS

### Gene targeting of *c-myc*<sup>25Iscel</sup> allele.

To generate the targeting construct, the ISceI site cassette was inserted into the pLNTK targeting vector and flanked with a 4.6-kb SphI-SphI 5' homology arm encompassing *c-myc* exon1 and a 2.6-kb SphI-SphI 3' homology arm containing *c-myc* exon 2 and 3. We electroporated the targeting construct into TC1 (129/Sv) ES cells and screened EcoRI-digested DNA to identify potentially targeted ES cell clones via Southern blotting with a 5' probe consisting of the 1.5kb XbaI-XbaI fragment upstream of *c-myc* exon1 and a 3' probe consisting of the 1.5kb XhoI-KpnI fragment downstream of *c-myc* exon3. We deleted the Neo cassette from targeted ES clones by infection with adenovirus expressing Cre-recombinase and used those to inject for germline transmission to generate *c-myc*<sup>25Iscel/wt</sup> mice.

### Retroviral Infection and CSR Assays

Empty pMX or pMX-IsceI vectors were transfected into Phoenix packaging cells. Viral supernatants were collected at 48 and 72 hours post-transfection and used for infecting  $\alpha$ CD40/IL4-stimulated B cells at day 1 and day 2 of stimulation. Cells were processed at day 4 of stimulation. Infection efficiency ranged from 70% to 90% as measured by IRES-GFP expression from the retroviral vector by flow cytometry. High titer retroviral infection of activated wt B cells leads to inhibition of end joining as evidenced by increased accumulation of AID-initiated *IgH* chromosome breaks (MG and FWA, unpublished data). This effect facilitates visualization of ISceI-induced *c-myc* breaks in *c-myc*<sup>25Iscel/wt</sup> wt B cells.

### Cytogenetic analysis: Two color FISH and FISH probes.

The FISH probes were as follows: a BAC that covered the 3' region of the *IgH* locus, encompassing the 3'*IgH* enhancer and 100kb of downstream sequences (3'*IgH* BAC) and a BAC just upstream of the *IgH* V<sub>H</sub> region (5'*IgH* BAC) as described previously<sup>10</sup>. All BACs outlined below were obtained from the BACPAC CHORI database. BACs for *Igλ* regions are RP23-382P9 (5'*Igλ*) and RP23-374P12 (3'*Igλ*), and BACs for *Igκ* regions are RP23-84F6 (5'*Igκ*), RP24-279F16 (*Igκ*) and RP23-64I9 (3'*Igκ*). BACs for *c-myc* regions are RP23-307D14 that



contains *c-myc* gene for interphase FISH, RP24-434C10 (5' *c-myc*) and RP23-113O21 (3' *c-myc*). In all FISH experiments, intact loci show co-localization of the red and green probes, while split red and green signals are scored as broken loci. Broken loci can be free, with the centromeric and telomeric portion of the locus either present in the metaphases or lost. Alternatively, broken loci (both the centromeric and telomeric parts or only one of them) can be involved in translocations with other chromosomes. For *IgH/Igλ* translocation FISH, representative *IgH/Igλ* translocation shows green and red signals juxtaposed on a dicentric chromosome. Also visible are a normal chromosome 12 with a red signal at the telomeric end and a normal chromosome 16 with a green signal close to the centromere. Whole chromosome paint specific for mouse chromosome 6, 12 and 16 were used according to the manufacturer instructions (Applied Spectral Imaging). Images of metaphases were captured with BX61 Microscope (Olympus) equipped with a motorized automatic stage, a cooled-CCD camera and an interferometer (Applied Spectral Imaging). 60× objective lens was used. Analysis was performed with the ScanView software (Applied Spectral Imaging).

### **3D interphase FISH.**

B cells, thymocytes or ES cells were transferred to a glass slide coated with Cell Tak (Becton Dickinson), fixed for 10 min with 4% paraformaldehyde, permeabilized in 0.1% saponin/0.1% Triton X-100 in PBS for 10 min, and immersed in liquid nitrogen for three freeze/thaw cycles. Slides were incubated in 0.1 M HCl, blocked in 3% BSA/100 mg/ml RNAase A, and re-permeabilized in 0.5% saponin/0.1% Triton X-100 in PBS. Genomic DNA was denatured at 73°C and hybridized with FISH probes labeled with either biotin or digoxigenin (Roche). Detecting antibodies were Streptavidin-Alexa 488 (Molecular Probes) and mouse anti-Dig-cy3 (Jackson Immuno Research laboratory) used at 1:200 dilution. We could not perform *Igκ* locus assays since the large size of *Igκ* (greater than 3Mb) obviates chromosomal break measurements via interphase FISH.

### **Primers and PCR conditions for *IgH/Igλ* translocations.**

Primers for *Jλ1* regions: 1<sup>st</sup> round primer, 5'-ATTGAATTTCTGTGGCCATAACTCC-3', 2<sup>nd</sup>

round primer, 5'-ACTCCCCTCTGTTTTTACTCCTTATTA-3'

Primers for *Jλ2* regions: 1<sup>st</sup> round primer, 5'- AGTTATTTCCCTCTTTGCTCCTGTGGTGAT-3',

2<sup>nd</sup> round primer, 5'-CTACTCTGGGGTTGGTGCCTACTG-3'

Primers for *IgH Sμ* regions: 1<sup>st</sup> round primer, 5'-GATCCCTCTACACCCTGCTATTTTC-3', 2<sup>nd</sup>

round primer, 5'-CACCCCTGCTATTTCCCTTGTGCTACTCTTA-3'

Probes: for *Jλ1* 5'-GCCTCTGTGCTGAATGTTCTGTGCTC-3', for *Jλ2* 5'-

TCAGGAGGTAGAGCACAGCAGCCACTT-3', for *Igh* 5'-

CCTGGTATACAGGACGAAACTGCAGCAG-3'

PCR condition: 1<sup>st</sup> round PCR, 94°C 3min, 94°C 15 sec, 58.2°C 15 sec, 68°C 7min + 20sec per

cycle, 25 cycles, 68°C 5min for final extension. 2<sup>nd</sup> round PCR, 94°C 3min, 94°C 15 sec, 58.2°C

15 sec for *Igh/Jλ1* or 60.3°C, 15sec for *Igh/Jλ2*, 68°C 7min, 25 cycles, 68°C 5min for final

extension.

#### **Primers and PCR conditions for *Igh/c-myc* translocations.**

Primers for *c-myc*<sup>wt</sup>: 1<sup>st</sup> round primer, 5'- GGGGAGGGGGTGTCAAATAATAAGA -3', 2<sup>nd</sup>

round primer, 5'- GACACCTCCCTTCTACTCTAAACCG -3'

Primers for *c-myc*<sup>25Isc</sup>: 1<sup>st</sup> round primer, 5'-GCTCTGCTGTTGCTGGTGATAGAA -3', 2<sup>nd</sup>

round primer, 5'- ATAGGGCTGTACGGAGTCGTAGTC -3'

Primers for *IgH Sμ* region: 1<sup>st</sup> round primer, 5'- TGAGGACCAGAGAGGGATAAAAGAGAA -

3', 2<sup>nd</sup> round primer, 5'- CACCCTGCTATTTCCCTTGTGCTAC -3'.

PCR conditions: 1<sup>st</sup> round PCR, 94°C 3min, 94°C 15 sec, 62 °C 15 sec, 68°C 7min + 20sec per

cycle, 25 cycles, 68°C 5min for final extension. 2<sup>nd</sup> round PCR, 94°C 3min, 94°C 15 sec, 62°C

15 sec, 68°C 7min, 25 cycles, 68°C 5min for final extension.
